1 **Title** Transformation of acoustic information to sensory decision variables in the  
2 parietal cortex

3  
4 **Authors** Justin D. Yao<sup>1\*</sup>, Klavdia O. Zemlianova<sup>1\*</sup>, David L. Hocker<sup>1</sup>, Cristina Savin<sup>1,5,6</sup>,  
5 Christine M. Constantinople<sup>1,5</sup>, SueYeon Chung<sup>1,4</sup>, Dan H. Sanes<sup>1,2,3,5</sup>

6  
7 <sup>1</sup> Center for Neural Science, New York University

8 <sup>2</sup> Department of Psychology, New York University

9 <sup>3</sup> Department of Biology, New York University

10 <sup>4</sup> Flatiron Institute, Simons Foundation

11 <sup>5</sup> Neuroscience Institute, NYU Langone School of Medicine

12 New York, NY 10003

13 <sup>6</sup> Center for Data Science, New York University

14 \*Co-first Author

15  
16 **Correspondence**

17 Justin D. Yao, PhD

18 Center for Neural Science

19 New York University

20 4 Washington Place

21 New York, NY 10003

22 Email [jdyao@nyu.edu](mailto:jdyao@nyu.edu)

23  
24 **Competing Interest Statement**

25 The authors declare no competing financial interests.

26  
27 **Key Words**

28 parietal cortex, auditory perception, decision-making, neural response manifold, geometric  
29 analysis

30 **Abstract**

31 The process by which sensory evidence contributes to perceptual choices requires an  
32 understanding of its transformation into decision variables. Here, we address this issue by  
33 evaluating the neural representation of acoustic information in auditory cortex-recipient parietal  
34 cortex while gerbils either performed an auditory discrimination task or while they passively  
35 listened to identical acoustic stimuli. During task performance, decoding performance of  
36 simultaneously recorded parietal neurons reflected psychometric sensitivity. In contrast, decoding  
37 performance during passive listening was significantly reduced. Principal component and  
38 geometric analyses each revealed the emergence of decision-relevant, linearly separable  
39 manifolds, but only during task engagement. Finally, using a clustering analysis, we found  
40 subpopulations of neurons that may reflect the encoding of separate segments during task  
41 performance: stimulus integration and motor preparation or execution. Taken together, our  
42 findings demonstrate how parietal cortex neurons integrate and transform encoded auditory  
43 information to guide sound-driven perceptual decisions.

## 44 **Introduction**

45 Integrating sensory information over time is one of the fundamental attributes that is required for  
46 accurate perceptual decisions (Brody and Hanks, 2016; Shadlen and Kiani, 2013). This process  
47 is supported by the transformation of stimulus representations into decision variables. In the case  
48 of auditory stimuli, prior to the formation of decision variables, the central representations of  
49 acoustic cues are gradually reconfigured along the auditory neuraxis. Thus, auditory neurons  
50 become more selective to contextually-relevant acoustic features as one ascends the central  
51 pathway into the auditory cortex (Wang, 2018). Ultimately, individual acoustic components merge  
52 into auditory objects to guide perception (Bizley and Cohen, 2013). Similarly, primary visual cortex  
53 neurons are selective to the stimulus orientation (Hubel and Wiesel, 1962, 1968), whereas higher  
54 cortices are selective for more complex characteristics (Rust and Dicarlo, 2010; DiCarlo et al.,  
55 2012; Movshon and Simoncelli, 2014). A hierarchical progression of sensory information  
56 processing is also seen across the somatosensory ascending pathway where receptive fields  
57 grow more complex (Iwamura, 1998). These hierarchically transformed neural signals are  
58 ultimately decoded downstream of sensory cortices for stimulus-dependent decisions (Gold and  
59 Shadlen, 2007; Bizley and Cohen, 2013; Tsunada et al., 2016; Gold and Stocker, 2017; Runyan  
60 et al., 2017; Town et al., 2018).

61  
62 Studies in both non-human primates and rodents suggest that the parietal cortex integrates  
63 sensory inputs and transforms them into decision signals (Shadlen and Newsome, 2001;  
64 Freedman and Assad, 2006; Harvey et al., 2012; Runyan et al., 2017; Driscoll et al., 2017). The  
65 parietal cortex receives direct projections from primary or secondary sensory cortices (Hackett et  
66 al., 2014; Wilber et al., 2015), has been causally implicated in the performance of perceptual  
67 decision-making tasks (Hanks et al., 2006; Katz et al., 2016; Licata et al., 2017; Yao et al., 2020),  
68 and its activity typically reflects action selection (Andersen and Cui, 2009; Hwang et al., 2017).  
69 Furthermore, parietal neurons gradually increase their spiking activity over time epochs that scale  
70 with the accumulation of sensory evidence (Roitman and Shadlen, 2002; Gold and Shadlen, 2007;  
71 Kiani et al., 2008; Hanks et al., 2015; Zhou and Freedman, 2019). Thus, while parietal cortex  
72 activity reflects decision variables, the manner in which relevant sensory stimuli are represented  
73 prior to this transformation remains uncertain.

74  
75 To dissociate encoding of stimuli from encoding of choice, we recorded neural activity from  
76 parietal cortex while gerbils performed an auditory discrimination task (Yao et al., 2020), and  
77 again during passive listening sessions, using the same acoustic stimuli in the absence of

78 behavioral choice. During task performance, decoded parietal cortex population activity correlated  
79 with psychometric sensitivity. Furthermore, neural trajectories from parietal cortex neural  
80 responses revealed the temporal progression of low-dimensional encoding of acoustic  
81 information that transitioned to encoding of behavioral choices. During passive listening sessions,  
82 decoded parietal cortex population activity was poorer than decoding during task performance,  
83 but scaled with stimulus duration. The neural trajectories differentiated between each stimulus  
84 condition, but did not reflect a decision variable. Thus, the parietal cortex could accumulate  
85 auditory evidence for the purpose of forming a decision variable during task performance. Finally,  
86 our clustering analysis based on neuronal response properties revealed subpopulations of  
87 parietal neurons that may reflect separate segments during task performance: stimulus integration  
88 and motor preparation or execution. We propose that the parietal cortex integrates and transforms  
89 bottom-up sensory information into decision variables during task performance.

90

## 91 **Results**

92 We trained gerbils ( $n = 5$ ) to perform a single-interval, two-alternative forced-choice AM rate  
93 discrimination task (Yao et al., 2020). Gerbils were trained to self-initiate each trial by placing their  
94 nose in a cylindrical port for a minimum of 100 msec. On each trial, a 4- or 10-Hz AM signal was  
95 presented from an overhead speaker and animals approached the left or right food tray on the  
96 opposite side of the test cage. A food pellet reward was delivered when animals approached the  
97 left food tray following a 4-Hz AM signal or the right food tray following a 10-Hz AM signal ([Figure](#)  
98 [1A](#)). To measure the minimum time necessary to accurately perform the task, AM stimulus  
99 duration was varied across trials (100-2000 msec), and performance was quantified as the  
100 proportion of correct trials. [Figure 1B](#) shows example psychometric functions from two different  
101 animals. In both examples, task performance improved with increasing stimulus duration and  
102 reached an optimum at  $\geq 800$  msec. [Figure S1](#) displays psychometric functions for all 5 gerbils ( $n$   
103  $= 44$  sessions). Minimum integration time was defined as the shortest stimulus duration at which  
104 animals discriminated between the two AM signals at a performance level of 0.76, which is  
105 equivalent to the signal detection metric,  $d'$  of 1 (Hacker and Ratcliff, 1979). The distribution of  
106 minimum integration times across all sessions is shown at the bottom of [Figure S1](#). There was no  
107 significant difference between minimum integration times for the 4- and 10-Hz AM signals  
108 (Wilcoxon signed-rank test,  $p = 0.67$ ; 4-Hz minimum integration time median: 391 msec; 10-Hz  
109 minimum integration time median: 402 msec), demonstrating animals were not biased to either  
110 stimuli.

111

112 To assess parietal cortex neuron responses during task performance, we implanted trained  
113 animals with 64 channel electrode arrays, and obtained wireless recordings during auditory  
114 discrimination task performance. These recordings were compared to responses from the same  
115 neurons while animals listened passively to the identical acoustic stimuli (Figure 1C). Recorded  
116 physiological data (Figure 1D) were preprocessed to extract candidate waveforms for offline spike  
117 sorting procedures. One anatomically confirmed electrode track within the parietal cortex is shown  
118 in Figure 1E. We recorded a total of 297 units (22.9%, 68/297 classified as single-units) during  
119 task performance sessions and 284 units during passive listening sessions (22.9%, 65/284  
120 classified as single-units). Figure S2 shows example post-stimulus time histograms (PSTHs) for  
121 one unit during one task performance and one passive listening session. The responses of all  
122 recorded units are shown in Figure 1F and G. Although there was a diversity of PSTH patterns  
123 during task performance, a fraction of parietal units displayed an initial decline in spike rate,  
124 followed by a gradual increase during the AM target stimuli. This temporal pattern of neural  
125 response was similar to that observed by parietal neurons during visual decision-making that also  
126 displayed ramping activity with increasing sensory evidence (Huk and Shadlen, 2005; Kiani et al.,  
127 2008; Okazawa et al., 2021). In contrast, a differential firing rate across time was not evident  
128 during passive listening sessions.

129

130 To determine whether parietal cortex population activity was sufficient to account for sound-driven  
131 task performance, we constructed linear classifiers using support vector machines (SVM), as  
132 described in Yao and Sanes (2018; see Methods). Briefly, AM discrimination was quantified  
133 across our parietal cortex population with a linear population readout scheme. The population  
134 linear classifiers were trained to decode responses from a proportion of trials to each individual  
135 AM rate signal (4- versus 10-Hz) across each stimulus duration (Figure 2A). Cross-validated  
136 classification performance was determined as the proportion of correctly classified held-out trials.  
137 This population decoder analysis was applied to our dataset in two ways. First, decoder  
138 performance was assessed from simultaneously recorded single- and multi-units within each  
139 behavioral session (i.e., “within-session” analysis; Figure 2B). Second, we assessed decoder  
140 performance for all units pooled across all behavioral sessions (Figure 2F).

141

142 For the within-session analysis, we implemented a standard criterion to only assess sessions with  
143 a minimum of 5 simultaneously recorded single- and/or multi-units ( $n = 28/44$  sessions). Figure  
144 2B shows example within-session population decoder results from two animals during task

145 performance. In both cases, decoding performance increases with longer stimulus durations, in  
146 line with psychometric performance. Decoding performance and corresponding behavioral  
147 performance for each stimulus type (4- and 10-Hz AM rate) across all sessions are shown in  
148 [Figure 3SA](#). Neural minimum integration times were calculated as the stimulus duration  
149 corresponding to decoding performance of 0.76. The distributions of neural minimum integration  
150 times are plotted in [Figure 3SB](#). We found a significant positive correlation between behavior  
151 integration times and corresponding decoder integration times ([Figure 2C](#);  $r = 0.49$ ,  $p = 0.02$ ), and  
152 similar trends were observed for both trial types ([Figure 3SC](#); 4-Hz AM:  $r = 0.54$ ,  $p = 0.01$ ; 10-Hz  
153 AM:  $r = 0.44$ ,  $p = 0.05$ ). This suggests parietal cortex activity reflects auditory-based decisions.

154  
155 We next asked whether the time course of decoder performance aligned with behavioral  
156 integration times. [Figure 2D](#) displays average  $\pm$  SEM decoding performance as a function of time  
157 for correct left versus right trials across all 31 recorded sessions. At trial onset, decoding  
158 performance was near chance, and increased to a peak value of  $\sim 0.80$  (average  $\pm$  SEM, Left:  
159  $0.81 \pm 0.03$ ; Right:  $0.80 \pm 0.03$ ). The maximum decoding performance occurred at  $\sim 350$  msec of  
160 AM signal duration which is nearly identical to the average behavioral integration time (378 msec;  
161 [Figure S1](#)). To illustrate choice-related activity across trial durations, we also plotted decoding  
162 performance as a function of time relative to response latency ([Figure 3SD](#)). Decoding  
163 performance gradually begins to increase  $\sim 1000$  msec prior to response latency and decoding  
164 performance peaks  $\sim 600$  msec prior to response latency.

165  
166 Although the striking alignment of neural and behavioral performance suggests that auditory  
167 information is being integrated within the parietal cortex, it does not provide a direct measure of  
168 stimulus coding. Therefore, we recorded from the same parietal neurons studied during task  
169 performance while animals listened passively to the identical 4 and 10 Hz AM stimuli ([Figures 1G](#)  
170 [and S2B](#)). Within-session population decoder results for two passive listening sessions are shown  
171 in [Figure 2E](#). Decoding performance across all sessions for each stimulus type are shown in  
172 [Figure S3E](#). The distributions of neural minimum integration times during passive listening  
173 sessions are plotted in [Figure S3F](#). Overall, only a fraction of passive listening sessions yielded  
174 minimum integration times ( $n = 17/29$ ; maximum decoding performance did not reach 0.76 for the  
175 remaining 12 sessions). For these passive listening sessions, decoding performance scaled with  
176 increasing stimulus duration ([Figure 2E and S3E](#)), suggesting that the parietal cortex could  
177 accumulate this sensory evidence for the purpose of forming a decision variable.

178

179 To directly compare decoder performance during task performance and passive listening, we  
180 examined the 19 instances where both types of session fit the criterion of 5 simultaneously  
181 recorded units. In the majority of those instances (13/19 sessions), minimum integration time was  
182 better or could only be calculated during task performance (Figure S3G). In 6 cases, integration  
183 time diminished or could not be calculated during task performance (Figure S3H). This suggests  
184 that the parietal cortex is more strongly engaged when animals are required to integrate sensory  
185 information for decision-making.

186

187 We further examined decoding performance as a function of the number of total recorded units  
188 for task performance and passive listening sessions (Figure 2F). A subsampling procedure was  
189 applied to randomly select a subpopulation of units (25-297 for task performance and 25-284 for  
190 passive listening sessions; increasing increments of 25) across 500 iterations. During each  
191 iteration of the resampling procedure, a new subpopulation of units was randomly selected  
192 (without replacement) prior to the decoding readout procedure. For each stimulus duration,  
193 decoding performance for both task performance and passive listening session types increased  
194 with the number of units, demonstrating evidence for population-level encoding.

195

196 If the parietal cortex does compute a decision variable, then its population activity should gradually  
197 evolve into two independent patterns. To test this idea, we assessed the dynamics of parietal  
198 cortex population activity by applying principal components analysis to the trial averaged neural  
199 responses (Figure 3A). This analysis was conducted on two of the five recorded animals as they  
200 both provided the large majority of recorded units (Gerbil 1  $n = 115/297$  units; Gerbil 2  $n = 165/297$   
201 units). Figure 3B depicts population activity in a three-dimensional (3D) principal component  
202 space that originated from PSTHs of recorded units from two animals during task performance  
203 (top 3 principal components, explained variance: Gerbil 1 = 79.7%; Gerbil 2 = 88.8%). The neural  
204 trajectories in this state space correspond to the population responses across different times for  
205 each AM rate and the stimulus durations. At stimulus onset, neural trajectories started at a similar  
206 position, but began to diverge toward the relevant decision subspace (4 Hz versus 10 Hz) after  
207 ~300 msec of acoustic stimulation. This divergence toward the relevant decision subspace over  
208 time is further demonstrated when we measured the euclidean distance between each pair of  
209 trajectories in the space spanned by the top three principal components (Figure 3C). Over time,  
210 the distance between the trajectories that correspond to the stimulus durations of opposing AM  
211 rates (4 Hz versus 10 Hz) dramatically increased (Figure 3C, upper right and lower left quadrants  
212 of each matrix; outlined in red), while the average distance between the trajectories that

213 correspond to the stimulus durations within each AM rate remained low (Figure 3C, upper left and  
214 lower right quadrants of each matrix). In other words, the resulting distance matrix is block  
215 diagonal showing that trajectories corresponding to the same choice remained closer to each  
216 other than to the trajectories corresponding to the opposite choice – thereby indicating the  
217 existence of a choice manifold. We define “manifold” as the collection of population neural  
218 responses that encode a stimulus. These results are consistent with the integration of sensory  
219 evidence over time and the representation of a decision variable (DV) by the neural population.

220

221 In principle, decision variables should not be computed when animals are disengaged from a  
222 sensory task. To test this idea, we performed the same PCA analysis to trial averaged neural  
223 responses recorded during passive listening sessions. Figure 4A depicts population activity in 3D  
224 principal component space that originated from PSTHs of recorded units from two animals during  
225 passive listening (top 3 principal components, explained variance: Gerbil 1 = 82.3%; Gerbil 2 =  
226 85.2%). In contrast to the neural trajectories of parietal cortex neural responses during task  
227 performance, the neural trajectories elicited during passive listening did not diverge according to  
228 the two separate manifolds corresponding to AM rates (Figure 3C versus Figure 4B, outlined red  
229 squares). This is reflected in the difference in decoding performance between the two behavioral  
230 conditions (Figure 2B, E, and F). Instead, the neural trajectories elicited by each combination of  
231 AM rate and stimulus duration eventually occupied separate positions in the principal component  
232 space. This is further demonstrated by the differences in distances between each stimulus  
233 condition (Figure 4B). Combined with the finding that several decoding sessions yielded an  
234 integration time ( $n = 17/29$ ; Figure S3F), this suggests that, while acoustic information is encoded  
235 in the parietal cortex during passive listening, decision variables are not computed.

236

237 Previous studies have hypothesized that the brain transforms sensory information into linearly  
238 separable representations (Cohen et al., 2020; Chung and Abbott, 2021). This “untangling” of  
239 representations has been suggested to be a more prominent feature of higher-order brain areas  
240 (Cohen et al., 2020; DiCarlo and Cox, 2007). Thus, the segregation of neural trajectories from  
241 parietal cortex activity into two separate subspaces during task performance may represent an  
242 encoding strategy that enables linear readout of decision variables (Figure 5A). To test whether  
243 the neural representations of the AM rate stimuli in principal component space are consistent with  
244 this prediction, we employed three measures of “untangling”: capacity, manifold radius and  
245 manifold dimensionality (Chung et al., 2018). These three measures define the separability of  
246 objects based on their neural manifolds. Capacity measures how many different object classes



247 can be linearly separated with high probability. Manifold radius and dimensionality quantify the  
248 size of the manifold; essentially, the variance of the points that belong to the manifold as well as  
249 its spread along different axes. To compute these measures, we first binned the spiking activity  
250 into 80 msec bins and then split the trial activity into 2 conditions according to the AM rates, 4-  
251 and 10-Hz, combining across stimulus durations as well as all of the animals. Consistent with the  
252 idea of untangling, we found that there was an increase in capacity (Figure 5B) and a decrease  
253 in manifold radius and dimensionality after the onset of the AM stimulus (Figure 5C and D). Finally,  
254 we computed the norm of the manifold center over time, which measures the distance of the  
255 center of the manifold to the origin, to understand if the object manifolds corresponding to each  
256 stimulus frequency move over time. This measure increased (Figure 5E), suggesting that the 4-  
257 and 10-Hz manifolds moved away from their starting position over time. These trends continue  
258 until about 600 msec into the AM stimulus (1000 msec of absolute trial time) at which point all  
259 four measures plateau. Importantly, the time course of this change in neural representation is  
260 consistent with the time window over which the animal has to accumulate evidence and make its  
261 decision. Together, our findings suggest that the transformation of sensory evidence into decision  
262 variables in the parietal cortex is accompanied by changes in the neural representation that  
263 supports the separability of the stimulus manifolds.

264

265 Up until this point, we have assumed that the recorded population was homogeneous. Therefore,  
266 we asked whether there were distinct functional classes and, if so, whether they differentially  
267 represented the decision variable. To test this, we performed clustering on PSTHs (Raposo et  
268 al., 2014; Namboodiri et al., 2019; Hocker et al., 2021). Specifically, for each neuron we averaged  
269 over trials with the same AM stimulus rate (4- or 10-Hz) to obtain two conditional PSTHs spanning  
270 the 2 seconds after trial initiation. We then concatenated these 2 PSTHs to create a high-  
271 dimensional feature space that represents the unique activity of each neuron across the two  
272 stimulus conditions. Analysis of the angles between these data points in feature space indicated  
273 that there were clusters in this dataset (PAIRS test, Raposo et al., 2014), and further analysis  
274 using the gap statistic revealed 3 subpopulations of neurons in the population response (Figure  
275 6A-D). Cluster 1, the largest cluster in the population, demonstrated activity at the onset of  
276 unmodulated noise (i.e., the 400 ms before the AM stimulus), and persisted through the trial  
277 (Figure 6A, B). Clusters 2 and 3 displayed decreased activity at the beginning of a trial, with a  
278 ramping of activity peaking at ~1s, which is approximately the time that animals had already made  
279 their initial movement towards the reward ports. Clusters 1 and 3 were well-represented, though  
280 Cluster 2 was predominantly represented in only one gerbil. We confirmed that this clustering

281 result is robust to different forms of pre-processing of the responses, such as downsampling to  
282 coarse time bins, or smoothing over multiple time bins (Figure S4A-D). Clustering on the passive  
283 condition reveals the presence of 2 clusters, though the population predominantly belonged to  
284 only a single cluster (Figure S5).

285  
286 To evaluate the computational roles of each neural cluster and determine whether specific  
287 subpopulations of neurons reflect the integration of sensory evidence and the formation of  
288 decision variables, we performed principal component analysis on each cluster individually.  
289 Specifically, the principal component analysis was fit to trial averaged neural responses across  
290 time for the 3 clusters separately for 2 of the 5 gerbils. The neural trajectories in this state space  
291 correspond to the population responses for each cluster across different times for separate AM  
292 rates and stimulus durations. We show the neural trajectories for each cluster in the space  
293 spanned by the top 3 principal components of each respective cluster (Figure 6E-G). The neural  
294 trajectories across all clusters show a separation between the two AM rates, but diverge at  
295 separate time points. This suggests that each cluster may encode different task-relevant  
296 information. For example, the neural trajectories in the principal component space of Clusters 1  
297 (Figure 6E) and 2 (Figure 6G) display strong divergence between the corresponding AM rates  
298 much sooner than the neural trajectories of Cluster 3 (Figure 6F). Specifically, the divergence of  
299 neural trajectories for Clusters 1 and 2 occurs within 600 msec after stimulus onset, which  
300 corresponds to the behaviorally-relevant integration times (Figure S1). This suggests that Clusters  
301 1 and 2 may reflect the transformed sensory signals received from the auditory cortex during task  
302 performance. The neural trajectories for Cluster 3 diverge later than ~600 msec after stimulus  
303 onset (>~1000 msec total trial duration), suggesting that Cluster 3 may reflect the motor  
304 preparatory signal that is executed during the task. Overall, our results demonstrate distinct  
305 subpopulations of parietal cortex neurons encode separate segments of task performance:  
306 stimulus integration and motor preparation or execution.

307

## 308 **Discussion**

309 Our central finding is that, during task performance, parietal cortex neurons integrate and  
310 transform behaviorally-relevant acoustic information to drive sound-driven perceptual choices.  
311 Decoded parietal cortex activity reflected psychometric sensitivity during task performance and  
312 aligned with behavioral measures of integration time. In contrast, decoded neural activity from  
313 passive listening sessions was dramatically reduced (Figure 2F). To analyze whether parietal  
314 cortex activity could support sensory evidence accumulation, we applied principal component and

315 geometric analyses, and found the emergence of decision-relevant, linearly separable manifolds  
316 that reflect behavioral integration time during task performance. Taken together with our previous  
317 finding that auditory cortex projections to the parietal cortex play a causal role in producing  
318 behavioral integration time (Yao et al., 2020), we propose that the parietal cortex transforms  
319 auditory afferent input into decision variables.

320

321 Previous work shows that parietal cortex neurons are strongly modulated by the behavioral  
322 relevance and context of acoustic stimuli (Stricanne et al., 1996; Nakamura, 1999; Grunewald et  
323 al., 1999; Linden et al., 1999). Furthermore, functional interactions of simultaneously recorded  
324 parietal neurons are greater than that seen among auditory cortex neurons and also extend to  
325 longer time scales (Runyan et al., 2017), demonstrating the transition to somewhat more  
326 behaviorally-relevant timescales for processing sensory information into stimulus-driven  
327 decisions. These functional properties are clearly associated with anatomical connectivity  
328 between primary or secondary auditory cortices to parietal cortex, which are strongly apparent  
329 across many species (Pandya and Kuypers, 1969; Reep et al., 1994; Rauschecker and Scott,  
330 2009; Wilber, et al., 2014; Song, et al., 2017; Yao et al., 2020).

331

332 Our current results complement these findings by demonstrating how auditory encoded  
333 information is transformed from an uninformative representation during passive listening, to  
334 meaningful integration times that reflect behavioral performance. During passive listening,  
335 decoded activity from simultaneously recorded parietal cortex neurons is poorer than decoded  
336 activity during task performance, but scales with stimulus duration (Figure 2E). Thus, evidence  
337 for encoded sensory inputs within parietal cortex derives from the scaling of decoded parietal  
338 cortex activity with the amount of presented stimulus information. Our principal component  
339 analyses further demonstrate an even greater difference of parietal cortex activity between  
340 behavioral conditions. Whereas encoded auditory information from parietal neurons occupied  
341 separate positions in subspace during passive listening (Figure 4A, B), we found an emergence  
342 of decision-relevant, linearly separable manifolds on a behaviorally-relevant timescale during task  
343 performance (Figure 3B, C). This is specifically demonstrated by a clear separation of manifolds  
344 that correspond to the two AM rates (4- and 10- Hz), which is also reflected by two separate  
345 decision outcomes (e.g., approach the left or right food tray). The transition of sensory encoding  
346 between passive and task-engaged contexts suggests that sensory information transitions into a  
347 decision-making context and reflects the learned association between sensory categorization and  
348 motor execution. This is in contrast to categorical sensory representations (Banno et al., 2020),

349 which would be true if parietal cortex neurons represented stimulus categories during passive  
350 listening conditions. It is worth noting that the recordings for the passive condition were collected  
351 from the same highly trained animals, so the differences in representation cannot be explained  
352 by the lack of association between stimulus and choice.

353  
354 Our principal component and geometric analyses demonstrated that decision variables emerge  
355 within parietal cortex activity during task performance. We predict that the role of the parietal  
356 cortex is to transform stimulus information into a representation that can be easily decoded into  
357 action. While the neural manifolds that correspond to 4- and 10-Hz AM rates increasingly diverge  
358 during task performance (Figure 3B), these representations become more “untangled,” or linearly  
359 separable, over behaviorally-relevant timescales (Figure 5A-E). This is computationally desirable  
360 because it suggests that the parietal cortex can read out auditory information using the simplest  
361 possible decoder. This result is consistent with predictions from artificial neural network models  
362 for auditory processing (Stephenson et al., 2019) and is also consistent with the previous  
363 findings that individual neurons show mixed selectivity for task variables (Okazawa et al.,  
364 2021) and may change activity patterns without affecting the overall ability of the population  
365 to encode the relevant task information (Driscoll et al., 2017). Finally, our result shows that  
366 this untangling of representations occurs not only by compression in dimensionality and size  
367 of the stimulus manifolds, but also by the stimulus manifolds moving away from each other.

368  
369 Clustering on the temporal responses of parietal cortex neurons during task performance revealed  
370 3 subpopulations of neurons, with two clusters being well-represented. One sub-population  
371 (“Cluster 1”) demonstrated the encoding of AM stimulus information, while the other dominant  
372 sub-population (“Cluster 3”) displayed a gradual increase in activity that peaked ~1 sec of total  
373 trial duration (~600 msec after stimulus onset), roughly around the time animals initiated their  
374 movement for reward retrieval. This late-in-trial segment is likely related to preparatory movement  
375 activity, and is distinctly separate from neurons that integrate stimulus information. A third cluster  
376 (“Cluster 2”) seemed to share a similar phenotype with Cluster 1 since its corresponding neural  
377 trajectories diverged relatively around the same time. However, when comparing PSTHs, Cluster  
378 2 neuronal responses were more modulated for ipsilateral (left; 4-Hz) conditions, relative to  
379 Cluster 1. It is important to note that this cluster was only present in 1 gerbil. It is possible that  
380 neurons from Cluster 2 may belong to Cluster 1, or alternatively, observing ipsilateral encoding of  
381 sensory evidence integration is simply a rare type of response property in the parietal cortex.

382

383 Previous studies did not find separable clusters when examining the mixed selectivity of parietal  
384 cortex activity (Raposo et al., 2014). In that work, PAIRS analysis was performed on time-  
385 averaged activity across different sensory stimuli (auditory and visual), and found that responses  
386 were not separable into distinct subpopulations. Our results in parietal cortex responses instead  
387 used time-dependent response profiles that were restricted to a single stimulus modality to  
388 analyze potential clustering. We believe that these two results do not conflict, and that taken  
389 together they highlight how clustering is a flexible tool to characterize a variety of encoding  
390 properties across subpopulations of neurons.

391

392 While our study focused on the sensory input to the parietal cortex, it did not address the neural  
393 mechanism that causes the transformation of sensory representations into decision variables.  
394 This process is thought to require descending input from the prelimbic region of the frontal cortex  
395 (Wilber et al., 2015; Granon and Poucet, 2000). The cingulate cortex may provide one source of  
396 task-relevant information to the parietal cortex as neurons can encode context-dependent signals,  
397 which can be read out by locus coeruleus activity (Joshi and Gold, 2022). This provides a potential  
398 neural circuit for appropriately modulating parietal cortex activity during task performance where  
399 represented encoded sensory information is integrated, grouped, and transformed into decision  
400 variables that can be projected to motor circuits (Harvey et al., 2012).

401

402 Our results do not indicate whether the formation of sensory-driven decisions also occurs in pre-  
403 motor circuits, such as those that strictly involve action planning, including striatal circuits (Cox  
404 and Witten, 2019). Furthermore, our results do not demonstrate whether the auditory temporal  
405 integration signals observed are exclusively computed within parietal cortex, or reflect a  
406 computation performed elsewhere in the brain that are contingent on motor execution, such as  
407 brainstem networks (Horwitz and Newsome, 1999; 2001; Horwitz et al., 2004; Felsen and Mainen,  
408 2008). Future work will determine whether the transformation of sensory integrated signals into  
409 task-engaged choice-specific variables occurs within separate neural circuits and/or is dependent  
410 on the execution of motor actions, such as the movements associated to report the decisions  
411 (Freedman and Assad, 2011).

412

413 In summary, the representation of behaviorally-relevant auditory information occurs in the parietal  
414 cortex even when animals are passively listening to the stimuli. However, it is only during task  
415 engagement that this information is transformed to a decision variable that correlates with  
416 psychometric performance. We demonstrated this with principal component and geometric

417 analyses, each of which show that sensory evidence is accumulated across a time frame that  
418 matches behavioral integration time (Yao et al., 2020). Thus, our findings provide a plausible  
419 argument for the parietal cortex's role in integrating and transforming encoded auditory  
420 information into decision variables to guide sound-driven behavior.

421

422

## 423 **Materials and Methods**

424 Adult Mongolian gerbils (*Meriones unguiculatus*,  $n = 5$ , 3 males) were weaned from commercially  
425 obtained breeding pairs (Charles River). Animals were housed on a 12 h light/12 h dark cycle and  
426 provided with ad libitum food and water unless otherwise noted. All procedures were approved  
427 by the Institutional Animal Care and Use Committee at New York University.

428

## 429 **Behavior**

### 430 *Behavioral apparatus*

431 Adult gerbils were placed in a plastic test cage (0.4 x 0.4 x 0.4 m) in a sound-attenuating booth  
432 (GretchKen Industries, Inc; internal dimensions: 1.5 x 1.5 x 2.2 m) and observed via a closed-  
433 circuit monitor. Acoustic stimuli were delivered from a calibrated free-field tweeter (DX25TG0504;  
434 Vifa) positioned 1 m above the test cage. Sound calibration measurements were made with a 1/4-  
435 inch free-field condenser recording microphone (Brüel & Kjaer) placed in the center of the cage.  
436 Stimulus, food reward delivery, and behavioral data acquisition were controlled by a personal  
437 computer through custom MATLAB scripts (written by Dr. Daniel Stolzberg:  
438 <https://github.com/dstolz/epsych>) and an RZ6 multifunction processor (Tucker-Davis  
439 Technologies).

440 Psychophysical training and testing was implemented with a positive reinforcement appetitive  
441 one-interval alternative forced-choice (AFC) procedure, as described previously (Yao et al.,  
442 2020). Briefly, gerbils were placed on controlled food access and trained to discriminate between  
443 amplitude modulated (AM) frozen broadband noise (25-dB roll-off at 3.5 kHz and 20 kHz) at 4-  
444 versus 10-Hz at 100% modulation depth. Each AM stimulus were presented at a sound pressure  
445 level (SPL) of 66 dB and had a 200 ms onset ramp, followed by an unmodulated period of 200  
446 ms that transitioned to an AM signal for a set duration, followed by an unmodulated period. Gerbils  
447 self-initiated trials by placing their nose in a cylindrical port (nose poke) for a minimum of 100 ms  
448 that interrupted an infrared beam and triggered an acoustic stimulus. During acoustic stimulation,  
449 a gerbil approaches the left or right food tray and the infrared beam at the correct food tray is  
450 broken, a pellet dispenser (Med Associates) delivers one reward dustless precision pellet (20 mg;

451 Bio-Serv). Gerbils were first trained to distinguish between 4- versus 10-Hz AM with a stimulus  
452 duration of 2,000 ms (proportion of trials correct > 0.85) across two sessions, and then were  
453 presented with shorter durations (e.g., 1,000, 800, 600, 300, and 100 ms) across subsequent  
454 sessions. For each trial, the probability of a 4- or 10-Hz AM stimulus presentation is 50% and its  
455 duration is a random draw. [Figure 1A](#) displays the schematic of the task.

456 During sessions to assess perceptual sensitivity, six signal durations for each of the 4- and 10-  
457 Hz AM stimuli (100, 300, 600, 800, 1,000, and 2,000 ms) are presented. Integration time is  
458 assessed by examining how performance scales with stimulus duration. Proportions of correct  
459 trials across stimulus durations for each AM rate are fitted with psychometric functions using the  
460 open-source package `psignifit 4` for MATLAB (Schutt et al., 2016). Psychometric functions of the  
461 proportion of correct trials are plotted as a function of stimulus duration. Minimum integration time  
462 was defined as the stimulus duration at which proportion of correct trials = 0.76, which is  
463 equivalent to the signal detection metric,  $d'$ , equal to 1 (Hacker and Ratcliff, 1979).

464

## 465 **Electrophysiology**

466 Extracellular single- and multiunit activity was recorded from the left medial parietal cortex. After  
467 gerbils were trained in the behavioral task, a silicon probe with 64 recording sites was implanted  
468 into the left medial parietal cortex (Neuronexus, model Buszaki64\_5x12-H64LP\_30mm). We  
469 targeted the medial portion of the parietal cortex because of its robust auditory cortex-recipient  
470 anterograde labeling (Yao et al., 2020). The probe was attached to a manual microdrive  
471 (Neuronexus, dDrive-XL) that allowed the electrode to be advanced and retracted. Probes were  
472 inserted at a 0- to 10-degree angle on a mediolateral axis. Typically, we aimed the rostral-most  
473 shanks of the array to be positioned at 3.3-3.6 mm rostral and 2.5 mm lateral to lambda. The  
474 surgical implantation procedure was performed under isoflurane anesthesia. Animals recovered  
475 for at least 1 week before being placed on controlled food access for further psychometric testing.  
476 At the termination of each experiment, animals were deeply anesthetized with sodium  
477 pentobarbital (150 mg/kg) and perfused with phosphate-buffered saline and 4%  
478 paraformaldehyde. Brains were extracted, post-fixed, sectioned on a vibratome (Leica), and  
479 stained for Nissl. Brightfield images were inspected under an upright microscope (Revolve Echo)  
480 and compared to a gerbil brain atlas (Radtke-Schuller et al., 2016) to verify targeted medial  
481 parietal cortex.

482 Physiological data were acquired telemetrically from freely-moving animals with a wireless  
483 headstage and received (W64, Triangle Biosystems). Analog signals were preamplified and  
484 digitized at a 24.414 kHz sampling rate (PZ5, Tucker-Davis Technologies) and fed via fiber optic

485 link to the RZ5 base station (Tucker-Davis Technologies) and PC for storage and post-processing.  
486 Offline, electrophysiological signals underwent a common average referencing procedure  
487 (Ludwig et al., 2009) and bandpass filtered at 300-5000 Hz. Significant noisy portions of the signal  
488 that were induced by extreme head movements were removed by an artifact rejection procedure.  
489 An open source spike package (KiloSort; Pachitariu et al., 2016) was used to extract and cluster  
490 spike waveforms. Manual inspection of spike waveforms was conducted in Phy (Rossant et al.,  
491 2016). Well-isolated single units displayed clear separation in principal component space and  
492 possessed few refractory period violations (<10%). Units that did not meet these criteria were  
493 classified as multi-units. All sorted spiking data were analyzed with custom MATLAB scripts.  
494 Recordings were made both during task performance, and during passively listening sessions  
495 that occurred after task performance. All passively listening sessions were recorded immediately  
496 after each recorded task performance session with the nose poke and food trays removed from  
497 the test cage.

498

## 499 **Neural analyses**

### 500 *Population coding*

501 We used a previously employed linear classifier readout procedure (Yao and Sanes, 2018) to  
502 assess AM rate discrimination across a population of parietal cortex neurons. Specifically, a linear  
503 classifier was trained to decode responses from a proportion of trials to each stimulus condition  
504 (e.g., 4 versus 10 Hz; [Figure 2A](#)). Spike count responses from all recorded neurons were counted  
505 within 100 msec time windows across the entire trial durations and formed the population  
506 “response vector”. Since the number of trials were typically unequal between stimulus conditions,  
507 we randomly subsampled (without replacement) a proportion of trials (i.e., 15 trials) from each  
508 unit. A support vector machine (SVM) procedure was used to fit a linear hyperplane to 80% of the  
509 data set (“training set”). Cross-validated classification performance was assessed on the  
510 remaining 20% across 250 iterations with a new randomly drawn sampled train and test sets for  
511 each iteration. Performance metrics were computed to determine the proportion of correctly  
512 classified and misclassified trials using an expanding time window (100 msec increments) across  
513 the entire trial duration. We restrained the analysis time window to correspond to each stimulus  
514 duration up to 600 msec (e.g., maximum time window did not exceed 300 msec for stimulus  
515 duration of 300 msec). A maximum time window of 600 msec was utilized for stimulus durations  
516 > 600 msec to control for movement-related signals that may arise when animals approach their



517 selected food tray. This was particularly the case during task performance sessions. The SVM  
518 procedure was implemented in MATLAB using the “fitsvm” and “predict” functions with the  
519 “KernelFunction” set to “linear”. This analysis was conducted for task sessions with  $\geq 5$   
520 simultaneously recorded units and performance on easiest trial conditions (e.g., 2000 msec AM  
521 duration)  $\geq 85\%$  ( $n = 27/44$  total sessions; median simultaneously recorded units = 6; interquartile  
522 range = 6.25).

523

#### 524 *Population response manifolds*

525 Principal component analysis (PCA) was performed separately for both task performance and  
526 passive listening session types for each animal using trial averaged PSTHs. Trial averages were  
527 computed by binning the spiking data into 10 msec bins and using a rolling mean with a 50 msec  
528 window for each of 12 conditions (2 stimulus AM rates X 6 Durations) with each unit contributing  
529 to the PSTH for each condition. The PSTHs focused on the period of decision formation and  
530 spanned 400-1400 ms after stimulus onset (0-1000 msec after AM onset). For each unit, we  
531 concatenated the PSTH for each condition into a matrix of size  $N \times CT$  where  $C$  is the number of  
532 conditions (2 AM rates x 6 durations),  $T$  is the number of time points (10 msec resolution) and  $N$   
533 is the number of units. Each row of the matrix was then z-scored since PCA is known to be  
534 sensitive to overly active units. For the task performance condition, only trials where the animal  
535 made the correct choice were used in the analysis. Trials with only one spike in the time window  
536 of interest were left out from analysis. Units that had no data for one or more of the conditions  
537 were left out from the analysis. Finally, the analysis included all units recorded either  
538 simultaneously or separately. We confirmed that the same qualitative results (the presence of  
539 decision subspace during task performance and lack of one during passive listening) were  
540 obtained using simultaneously recorded units only.

541

#### 542 *Calculating distance between neural trajectories*

543 To quantify the distance between neural trajectories (Figure 3C and 4B), we performed a  
544 bootstrapping procedure where the trial average was calculated over a random subsample of 10  
545 trials per condition and this was done 1000 times to create 1000 new trial averages per condition  
546 per unit. These conditions (1000 x 12 conditions) were concatenated into a matrix ( $N \times 1000 CT$ ).  
547 PCA was then performed on this matrix after z-scoring each row. This bootstrap procedure  
548 created a population of trajectories for each condition that captures some information about how  
549 much these trajectories may vary. It is worth noting that PCA assumes that the noise in the

550 neurons is uncorrelated and since we are using pseudo-populations, it is possible we are  
551 underestimating the correlations between neurons. Noise correlations between neurons can  
552 either increase or reduce the separation of these trajectories, which may affect decoding accuracy  
553 (Averbeck et al. 2006). To calculate the distance between every pair of trial averaged trajectories  
554 for each time point, we computed the euclidean norm between the same time point for every pair  
555 of averaged trajectories in the space defined by the top 3 principal components.

556

## 557 Geometric Analysis

558 To understand how the representation of stimulus information in the parietal cortex changes over  
559 the course of decision-making, we use the mean-field theoretic manifold analysis technique  
560 (Chung et al., 2018; Cohen et al., 2020; Stephenson et al. 2019) to study the geometric properties  
561 of the stimulus manifolds, including their manifold capacity, radius and dimensionality. To prepare  
562 the data, we counted the number of spikes per neuron in each 80ms time bin for each correct trial  
563 for the first 1200ms of each trial. Next, we define 2 object manifolds, corresponding to the 4- and  
564 10-Hz stimulus. We subsampled 50 trials, combining across stimulus durations and animals, for  
565 each object manifold. Together, this formed a matrix of size (297 neurons x 2 object manifolds x  
566 50 trials x 14 time points). The neural activations for each stimulus frequency over the 50 trials  
567 defines the manifold for that stimulus frequency at each time point. The mean-field theoretic  
568 manifold analysis technique then uses this set of activations to compute geometric properties of  
569 each object manifold and to evaluate their linear separability. Calculation of each measure was  
570 performed using the Replica Mean Field Theory Analysis python library (Stephenson et al. 2019)  
571 but we briefly describe the methodology below.

572

573 Manifold capacity refers to the maximum number of object manifolds that can be linearly  
574 separable given a fixed number of features. If we consider  $P$  object manifolds and  $N$  neurons, the  
575 manifold capacity is defined as  $\alpha = P/N$ . Intuitively, when  $\alpha$  is small, then there are few manifolds  
576 in a high dimensional space thus making it very easy to find a separating hyperplane for most of  
577 the random dichotomy of labels. Alternatively, when  $\alpha$  is large, there are many object manifolds  
578 in a low dimensional space and therefore, it becomes less likely that any dichotomy of manifolds  
579 can be linearly separable. The critical manifold capacity, as computed in our analysis, refers to  
580 the maximum number of object manifolds  $P$  that can be linearly separated given  $N$  neurons. This  
581 quantity can be estimated from the statistics of anchor points, representative support vectors  
582 defining the optimal separating hyperplane, following the methods described in Chung et al. 2018.

583 In [Figure 5](#), we report manifold capacity relative to its lower bound of  $2/M$ , where  $M$  is the number  
584 of samples.

585

586 Manifold dimensionality, computed from the realized anchor points, estimates the embedding  
587 dimension of the manifold contributing to classification. The dimensionality is bounded above by  
588  $\min(M, N)$ . Since we have  $M < N$ , we report manifold dimensionality relative to  $M$  in [Figure 5D](#).

589

590 Manifold radius is the average distance between the center of the manifold and its anchor points.  
591 For linear separability, we care about the size of manifolds relative to how far they are from each  
592 other. The manifold radius is therefore reported relative to the norm of the center of the manifold.  
593 We also compute the norm of the center of the manifold separately in [Figure 5E](#) to estimate how  
594 the locations of the manifolds shift over time.

595

#### 596 *Clustering*

597 Neuronal responses were clustered using K-means on a features space comprised of trial-  
598 averaged, conditional PSTHs for left-cued and right-cued trials. PSTHs were binned into 10 ms  
599 bins, and were then smoothed over a 500ms moving window to reduce noise on the responses  
600 (Matlab's `smooth.m` function). Each PSTH was then z-scored and combined into a total data  
601 matrix  $Z$ , where  $N$  is the number of neurons and  $T=151$  is the number of data points  
602 for each conditional PSTH. PCA was performed on  $Z$  to reduce the dimensionality of population  
603 responses to obtain principal components  $W$  and score  $M$ , as  $Z = W^T M$ . This feature space required  $k=16$   
604 components to explain >95% of the covariance in  $Z$ . The first  $k$  columns of  $M$  (data projection onto  
605 the top principal components) were used as the feature space for clustering.

606 The gap statistic criterion was used to determine a principled choice of the best number of clusters  
607 (`evalclusters.m` in Matlab, 5000 samples for reference distribution) (Tibshirani et al., 2001).  
608 Specifically, the chosen cluster was defined as the smallest cluster size  $K$ , beyond which jumps  
609 in gap score  $\text{Gap}(K)$  plateaued and became insignificant,

610

$$611 \quad \text{Gap}(K) \geq \text{Gap}(K - 1) + 2SE(K - 1)$$

612

613 We used the PAIRS statistic to determine if clusters were present in conditional PSTH responses  
614 of parietal neurons (Raposo et al., 2014; Hocker et al., 2021). The dimensionality reduced feature  
615 space (*i.e.*, the first  $k$  columns of  $M$ ) were further pre-processed with a whitening transform to  
616 yield zero mean and unit covariance. For each data point, the average angle with  $n=4$  of its closest

617 neighbors,  $\tilde{\theta}_{\text{data}}$ , was calculated. This angle distribution was compared with  $N=10,000$  sets of  
618 independent draws from a reference Gaussian distribution ( $N(0,1)$ ), with the same number of data  
619 points and the same dimensionality as our data. This  $N$  datasets were aggregated into a grand  
620 distribution, giving the estimated angles  $\theta_{\text{ref}}$ . The number of nearest neighbors  $m$  is  
621 conventionally chosen as the number of neighbors required to give a median nearest neighbor  
622 angle  $\pi/4$  for the reference distribution. This number is dependent on the dimensionality of the  
623 data, and given the high dimensionality of these responses, even  $K=2$  neighbors yielded larger  
624 angles than  $\pi/4$ . We chose  $m=4$  for the results in this work, but note that significant clustering  
625 was seen for a wide range of  $m$  values ( $m=[2,6]$ ).

626 PAIRS is a summary statistic of these averages nearest neighbor angles, using the median from  
627 the data distribution,  $\tilde{\theta}_{\text{data}}$  and the median of the grand reference distributions  $\tilde{\theta}_{\text{ref}}$ :

628

$$629 \quad PAIRS = \frac{\tilde{\theta}_{\text{ref}} - \tilde{\theta}_{\text{data}}}{\tilde{\theta}_{\text{ref}}}$$

630

631 To calculate  $p$ -values for the PAIRS statistic, reference  $PAIRS$  values were generated for each of  
632 the  $N$  reference data sets, and the two-sided  $p$  value (assuming a normal distribution) for the data  
633  $PAIRS$  compared to the distribution of reference  $PAIRS$  values were reported. We additionally  
634 performed a Kolmogorov Smirnov test on the grand reference distribution and data distribution of  
635 median nearest neighbor angles.

636

### 637 *Statistics*

638 Statistical analyses and procedures were implemented with custom-written MATLAB scripts (The  
639 Mathworks) that incorporated the MATLAB Statistics Toolbox or in JMP 13.2.0 (SAS). Normally  
640 distributed data (as assessed by the Lilliefors test) are reported as mean  $\pm$  SEM unless otherwise  
641 stated. When data were not normally distributed, non-parametric statistical tests were used when  
642 appropriate.

643 **Figures and Figure Legends**

644

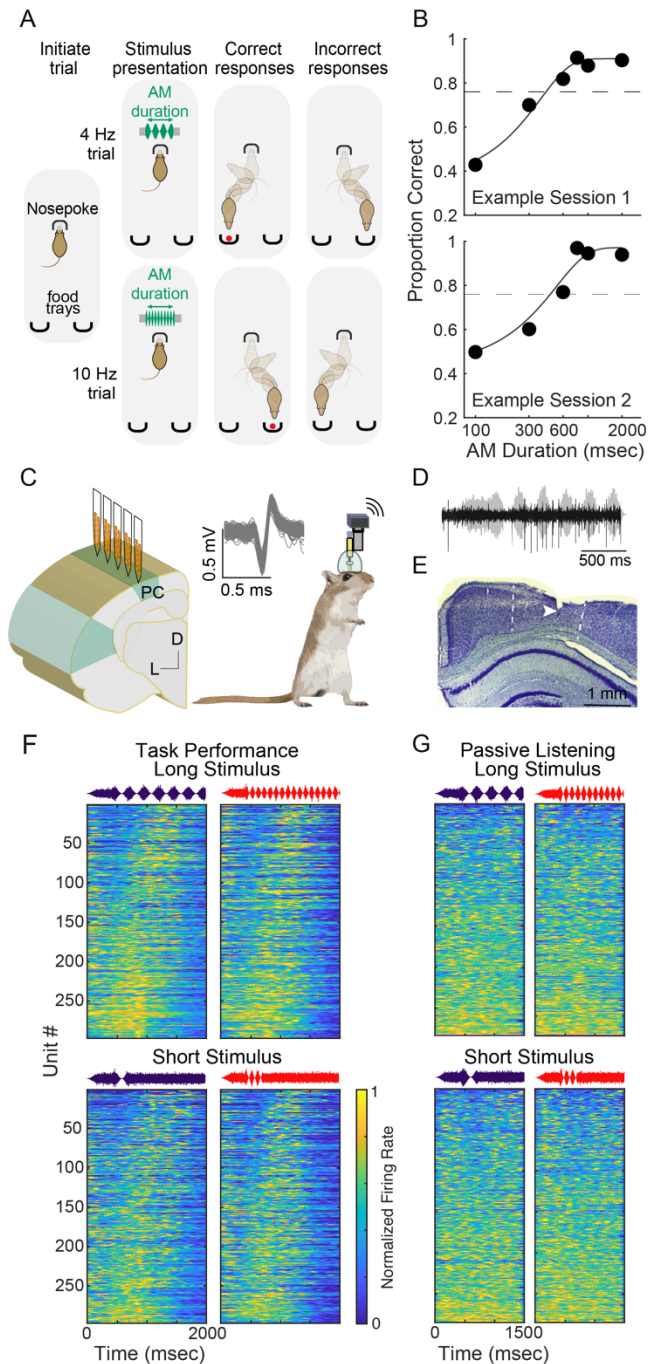

645

646

**Figure 1. Behavioral measures of auditory task performance and neural recordings**

647 **(A)** Schematic of the single-interval, two-alternative forced-choice AM rate discrimination task.

648 Gerbils are required to discriminate between amplitude-modulated broadband noise presented at  
649 4- versus 10-Hz across a range of stimulus durations (100-2000 msec).

650 **(B)** Two example psychometric functions from two animals.

651 **(C)** Chronic 64-channel electrode arrays were implanted into the left parietal cortex of 5 gerbils.

652 **(D)** Raw waveform trace of neural response to AM signal.

- 653 **(E)** Anatomically confirmed electrode track within the parietal cortex.
- 654 **(F)** Normalized firing rate activity of all parietal cortex neurons during task performance sessions  
655 (n = 297) for “Long Stimulus” duration of 2000 msec (top) and “Short Stimulus” duration of 300  
656 msec (bottom), sorted by time of maximum activity.
- 657 **(G)** Same format as panel **F**. Normalized firing rate activity of parietal cortex neurons during the  
658 passive listening session (n = 284). Note that the total stimulus time is shorter for passive listening  
659 because trials did not exceed a total stimulus time of 1500 msec.

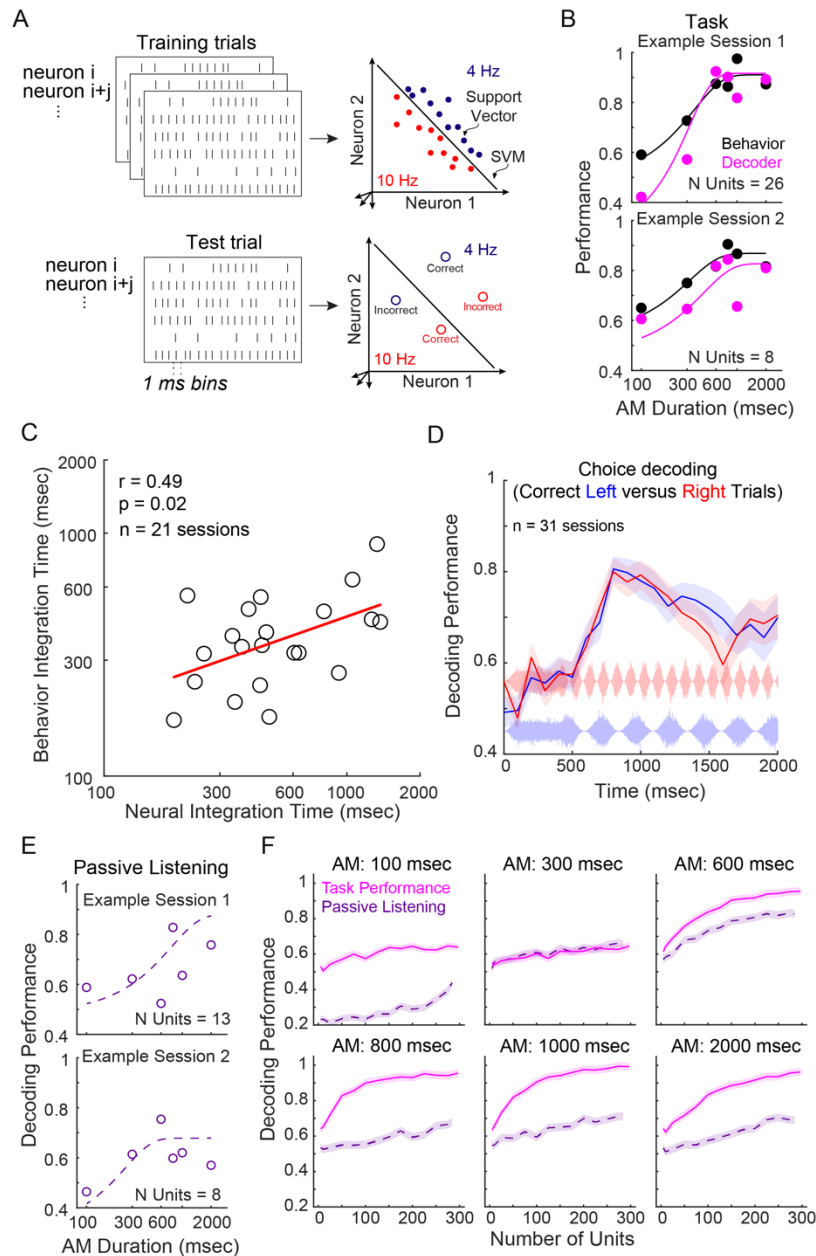

660

661 **Figure 2. Parietal cortex population activity reflects auditory task performance and**  
 662 **contains auditory information**

663 **(A)** Schematic of linear population readout procedure. Population linear classifiers were trained  
 664 to decode the responses from a subpopulation of simultaneously-recorded parietal cortex neurons  
 665 from a proportion of trials to each AM rate signal (4 Hz versus 10 Hz) across each stimulus  
 666 duration. Cross-validated classification performance was determined as the proportion of  
 667 correctly classified held-out trials that were not used during classifier training. This procedure was  
 668 performed across 250 iterations with new randomly drawn sampled train and held-out trials for  
 669 each iteration.

670 **(B)** Within-session population decoder results (pink) and corresponding behavior performance  
 671 (black) from two example sessions from two animals during task performance.

672 **(C)** Behavior versus neural integration times. Solid red line represents the linear regression.  
673 Pearson's  $r$  and statistical significance are noted in the top-left corner of the figure panel.  
674 **(D)** Average  $\pm$  SE within-session decoding performance for correct Left versus Right trials.  
675 **(E)** Within-session population decoder results from two example sessions from two animals during  
676 passive listening sessions.  
677 **(F)** Population decoding performance for task performance (pink) and passive listening (purple)  
678 conditions across increasing number of recorded units for each stimulus condition. A resampling  
679 procedure was used to randomly select a subpopulation of units with increasing increments of 25  
680 across 500 iterations prior to applying the decoding readout procedure. Decoding performance  
681 for both session types increased with the number of units. For all stimulus durations except 300  
682 msec, decoding performance during task performance exceeded that of passive listening  
683 sessions across all unit totals. For passive listening sessions, maximum decoding performance  
684 was found when including all recorded units, whereas decoding performance during task  
685 performance reached its peak when including  $\sim$ 80% of total units. Maximum decoding  
686 performance for task performance sessions asymptotes higher than passive listening sessions,  
687 but are comparable between 300-600 msec stimulus duration ([Figure S3I](#)), which is near the  
688 average behavioral integration time.



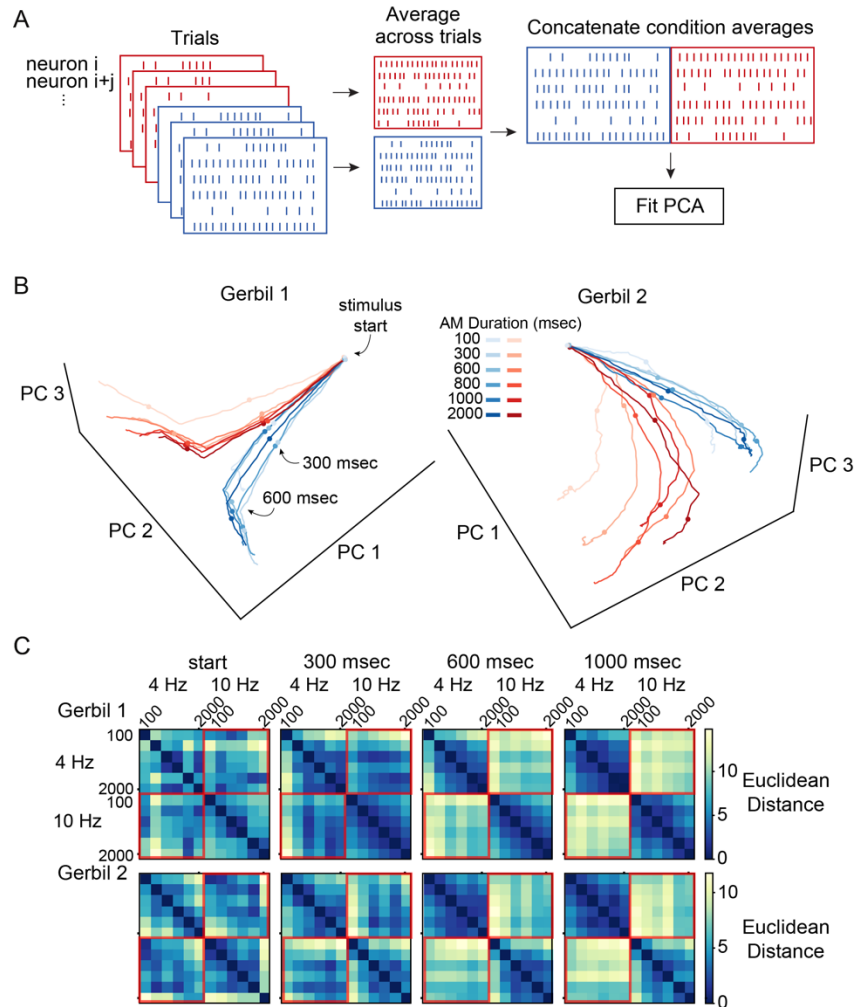

689

690 **Figure 3. Parietal cortex population dynamics during task performance**

691 **(A)** Principal component analysis (PCA) was performed on trial averaged neural responses from  
692 two of the five implanted gerbils.

693 **(B)** Population activity plotted in a three-dimensional (3D) principal component space that  
694 originated from PSTHs of all recorded units for two gerbils during task performance. The neural  
695 trajectories (i.e., neural manifolds) in this state space correspond to the population responses  
696 across different times for separate AM rates and stimulus durations. Dot symbols represent 0,  
697 300, and 600 msec after stimulus (AM) onset.

698 **(C)** Distances between each stimulus condition, calculated using euclidean distance in the space  
699 spanned by the top 3 principal components, across time points of 0, 300, 600, and 1000 msec  
700 after AM onset.

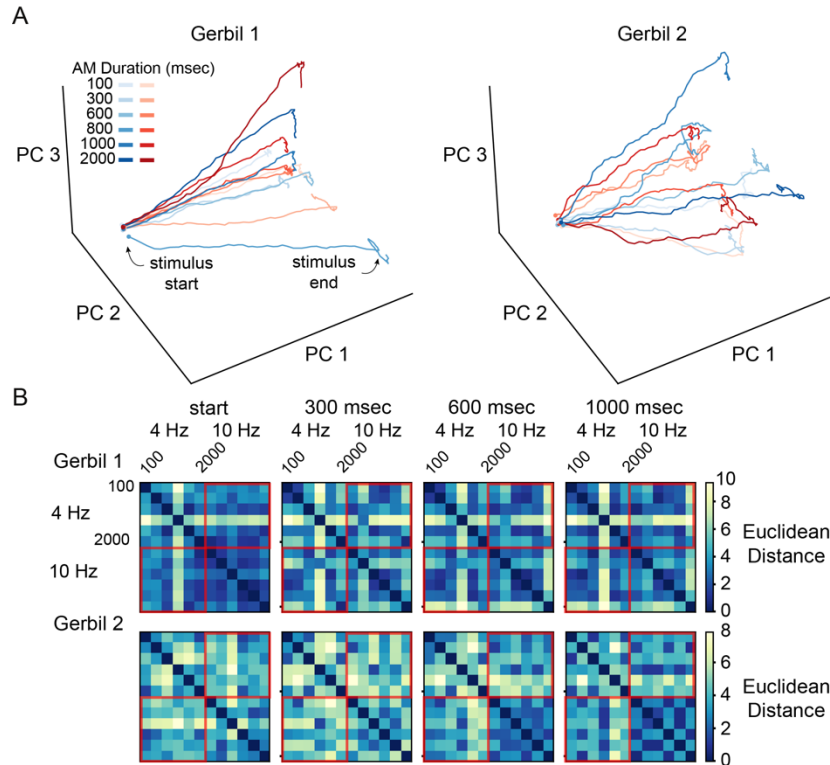

701  
702  
703  
704  
705  
706  
707  
708  
709

**Figure 4. Parietal cortex population dynamics during passive listening**

**(A)** Population activity plotted in a three-dimensional (3D) principal component space that originated from PSTHs of all recorded units for two gerbils during passive listening. The neural trajectories (i.e., neural manifolds) in this state space correspond to the population responses across different times for separate AM rates and stimulus durations.

**(B)** Distances between each stimulus condition, calculated using euclidean distance in the space spanned by the top 3 principal components, across time points of 0, 300, 600, and 1000 msec after AM onset.

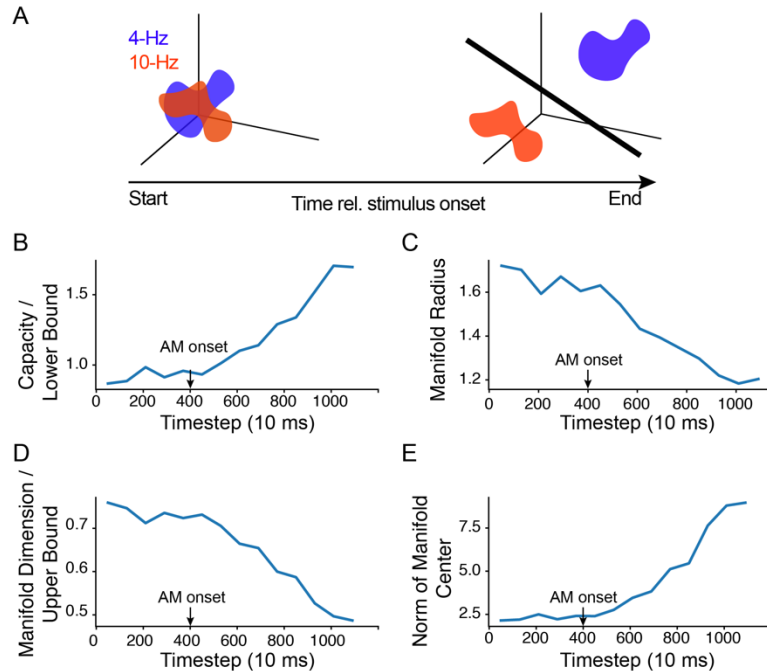

710

711 **Figure 5. “Untangling” of neural responses**

712 **(A)** 4- and 10-Hz stimulus manifolds (blue and red clouds) are entangled at the beginning of the  
713 trial but become more linearly separable over the course of the stimulus integration window.

714 **(B)** Change in the mean manifold capacity over time. Amplitude modulated sound onset is at 400  
715 msec. Increasing capacity corresponds to an increase in linear separability of the manifolds. **(C)**

716 Change in the mean manifold radius over time. Decreasing radius corresponds to an increase in  
717 linear separability of the manifolds.

718 **(D)** Change in the mean manifold dimensionality over time. Decreasing manifold dimensionality  
719 corresponds to an increase in linear separability.

720 **(E)** Change in the mean norm of manifold center over time. Increasing norm of manifold center  
721 corresponds to manifolds moving further away from the origin.

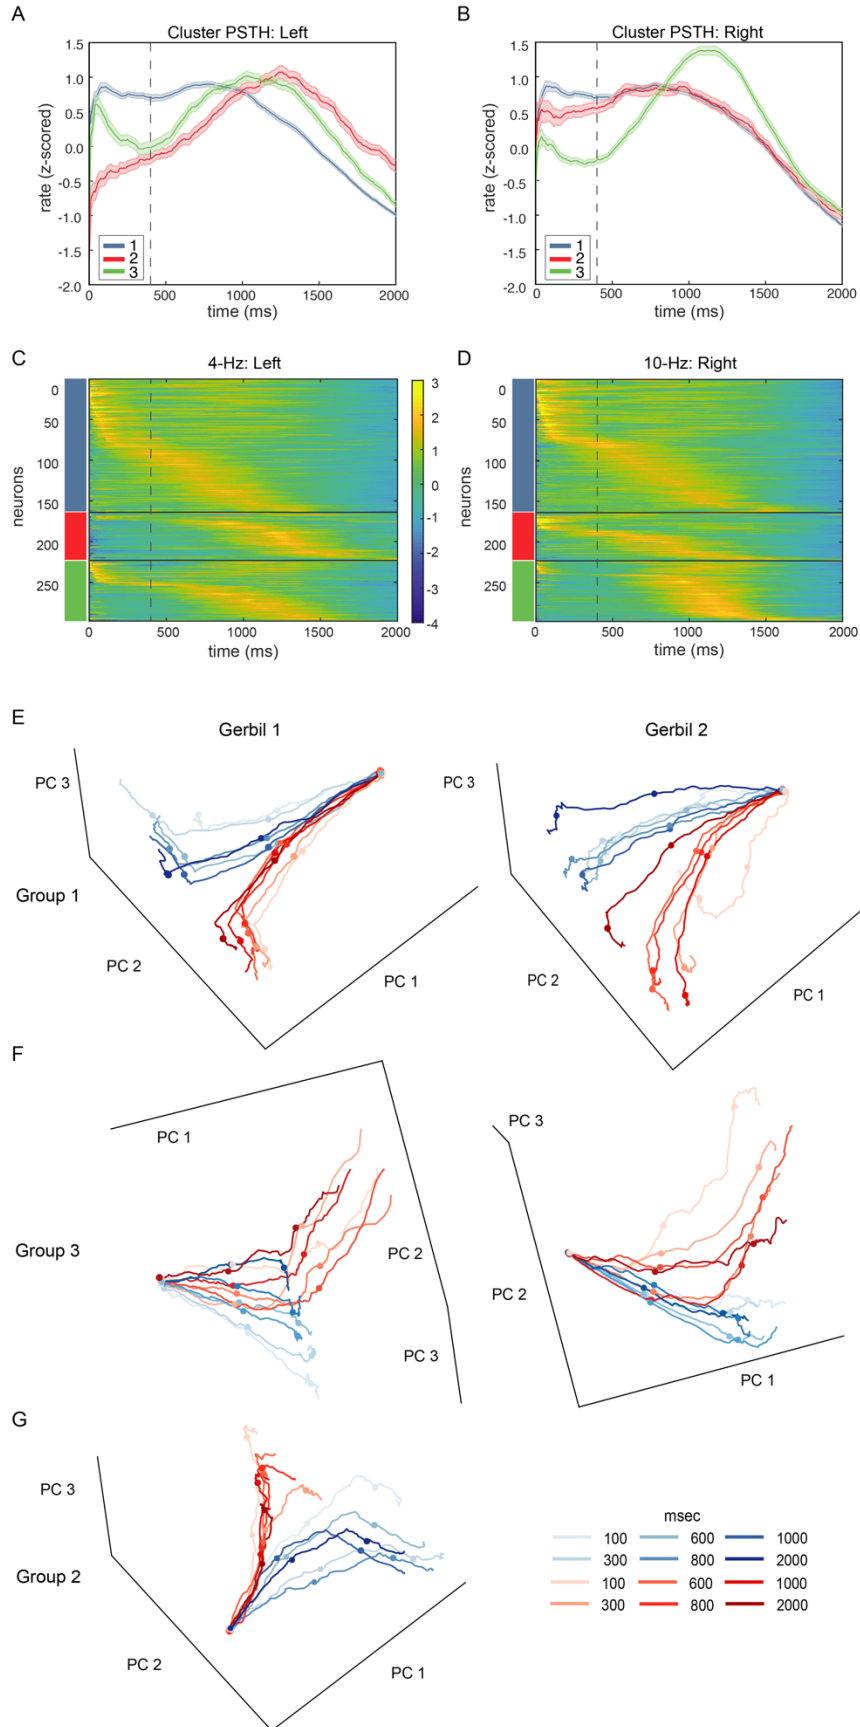

723 **Figure 6. Clustering of conditional PSTH responses reveals three distinct subpopulations**  
724 **of neurons in the parietal cortex.**

725 **(A)** Cluster-averaged PSTH for 4-Hz AM stimulus indicating a reward at the left reward port.

726 **(B)** Similar to **(A)**. 10-Hz AM stimulus indicating food at the right reward port. Dotted line indicates  
727 onset of the 4- and 10-Hz AM stimulus, and error bars denote s.e.m.

728 **(C)** Population PSTH responses for 4-Hz AM stimulus.

729 **(D)** Similar to **(C)** except for 10-Hz AM stimulus. Responses are grouped by cluster identity  
730 (colored rectangles), and sorted by time-to-peak within each cluster, for each stimulus condition.

731 **(E)** Population activity plotted in a 3D principal component space that originated from PSTHs of  
732 “Group 1” units for two gerbils during task performance.

733 **(F)** Population activity plotted in a 3D principal component space that originated from PSTHs of  
734 “Group 3” units for two gerbils during task performance.

735 **(G)** Population activity plotted in a 3D principal component space that originated from PSTHs of  
736 “Group 2” units for one gerbil during task performance. Dot symbols represent 0, 300, and 600  
737 msec after stimulus (AM) onset.

738 **Supplementary Figures**  
739

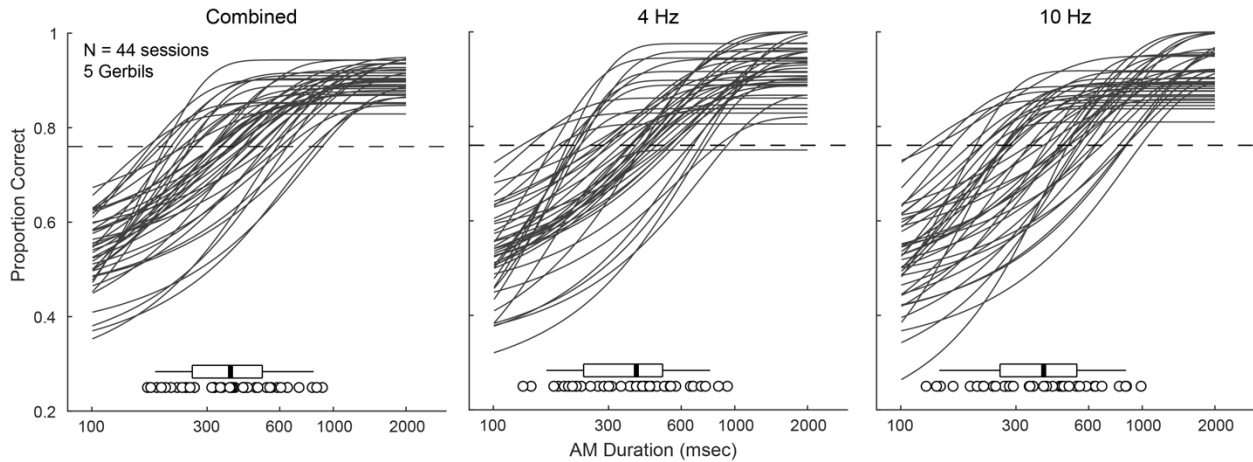

740  
741 **Supplementary Figure 1.**

742 Psychometric functions for all 5 gerbils (44 total sessions) for each AM rate condition. The  
743 distribution of minimum integration times for each condition are plotted within each panel. Solid  
744 vertical lines within the box and whisker plots represent the median.  
745

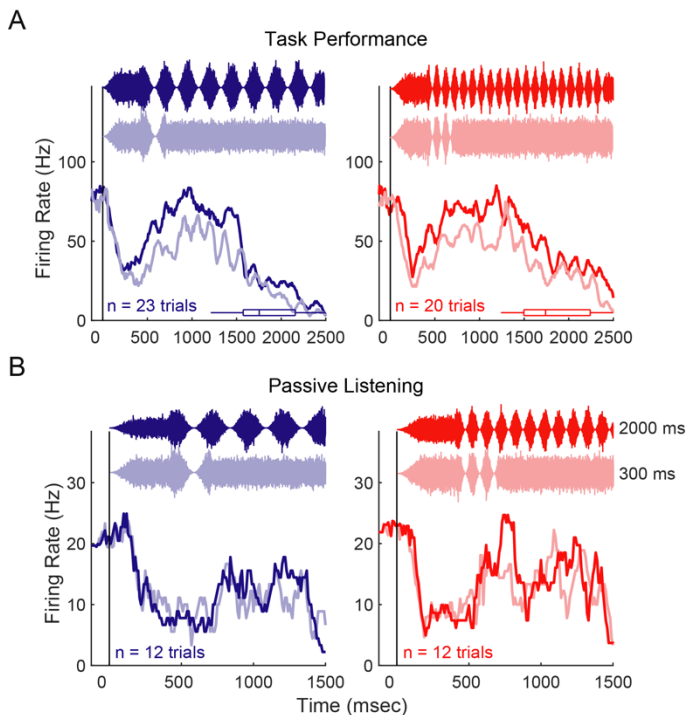

746  
747 **Supplementary Figure 2.**

748 **(A)** Example trial-averaged firing rate post-stimulus time histograms (PSTHs) for one unit  
749 recorded during one task performance session across stimulus durations of 300 and 2000 msec.  
750 Bin width: 10 msec. Box and whisker plots represent the distribution of response latencies.  
751 **(B)** Example trial-averaged firing rate PSTH from the same unit recorded during one passive  
752 listening session across stimulus durations of 300 and 2000 msec. Bin width: 10 msec.

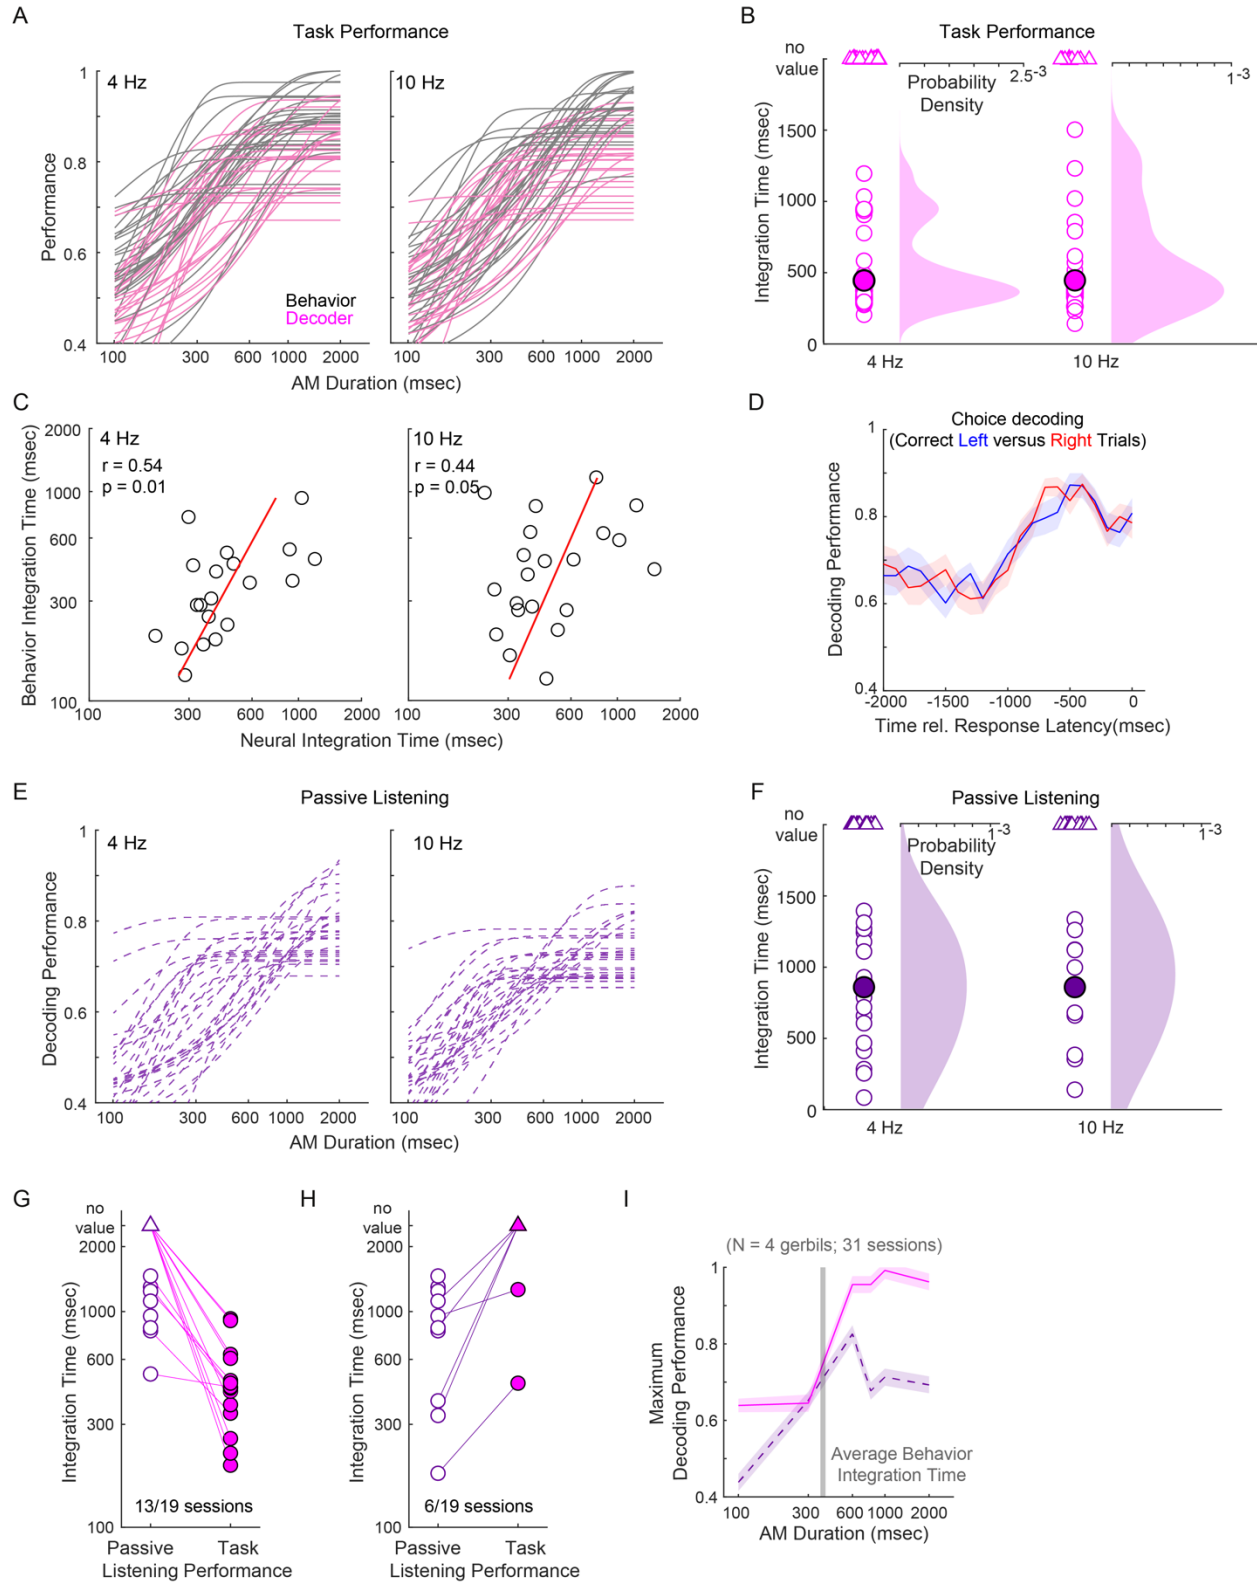

753

754

**Supplementary Figure 3.**

755 (A) Decoding performance and corresponding behavioral performance for each AM rate (4- and

756 10-Hz) for all sessions.

757 **(B)** Distributions of neural integrations for each AM rate condition. Of the 28 sessions examined,  
758 21 yielded a minimum integration time, while the remaining 7 sessions did not reach the  
759 performance criterion on 0.76. There was no significant difference of minimum integration times  
760 between acoustic stimuli (Wilcoxon signrank test,  $p = 0.50$ ; 4-Hz AM median: 402.8 msec; 10-Hz  
761 AM median: 407 msec).

762 **(C)** Behavior versus neural integration times for each AM rate condition. Solid red line represents  
763 the linear regression. Pearson's  $r$  and statistical significance are noted in the top-left corner of the  
764 figure panel.

765 **(D)** Average  $\pm$  SEM within-session decoding performance for correct Left versus Right trials  
766 plotted as a function of time relative to response latency.

767 **(E)** Decoding performance for each AM rate during passive listening for each session.

768 **(F)** Distributions of neural integrations for each AM rate condition during passive listening. Only a  
769 portion of passive listening sessions yielded minimum integration times ( $n = 17/29$ ; maximum  
770 decoding performance did not reach 0.76 for the remaining 12 sessions). Of the 17 eligible  
771 sessions, there was no significant difference of minimum integration times between acoustic  
772 stimuli (Wilcoxon signrank test,  $p = 0.49$ ; 4-Hz AM median: 829.7 msec; 10-Hz AM median: 838.8  
773 msec).

774 **(G)** Neural integration times between corresponding task performance and passive listening  
775 sessions. There were 19 instances where both corresponding task performance and passive  
776 listening sessions fit the criterion of 5 simultaneously recorded units. Of those 19 instances, 68.4%  
777 (13/19) displayed a decrease in minimum integration times from passive listening to task  
778 performance. 8/19 passive listening sessions did not yield a minimum integration time and the  
779 remaining 11 sessions produced relatively short minimum integration times ( $514.5 \pm 112.7$  msec).

780 **(H)** In 6 cases, integration time diminished or could not be calculated during task performance  
781 (passive listening sessions produced minimum integration times of  $668.6 \pm 217.7$  msec).

782 **(I)** Average  $\pm$  SEM maximum decoding performance across increasing number of units across  
783 each stimulus duration for task performance (pink; solid line) and passive listening (purple;  
784 dashed line) sessions. Vertical gray bar represents average behavior integration ( $n = 31$   
785 sessions).



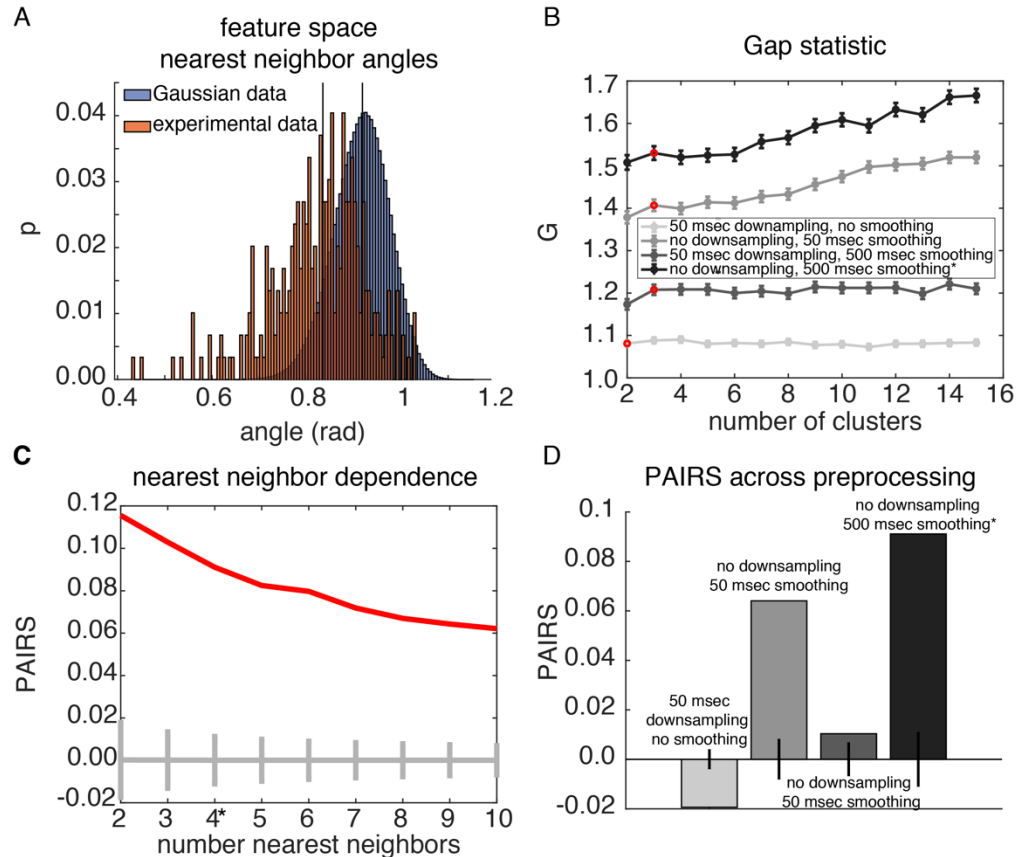

786

787

**Supplementary Figure 4. Additional clustering analyses.**

788

**(A)** Analysis of angles among nearest neighbors in feature space (red) compared to a null distribution of gaussian data (blue). KS-statistic between these distributions is significantly different (KS test,  $p = 10^{-55}$ ), and PAIRS statistic additionally indicated clustering within the conditional PSTH-based feature space (PAIRS = 0.09,  $p = 10^{-57}$ ).

792

**(B)** Gap statistic test for determining number of clusters across different preprocessing steps of the feature space. Data was z-scored in all cases, with additional downsampling from 10 msec, and/or smoothing over successive time bins. Red dots indicate the number of identified clusters, and error bars denote SEM. 500 msec smoothing without downsampling provided the largest gap statistic values, and this preprocessing was used for clustering in the main figure results.

797

**(C)** PAIRS statistic values for different choices of nearest neighbors size. Red line indicates PAIRS value, and gray line indicates PAIRS value of null distribution, with error bars denoting the 95% confidence interval. 4 nearest neighbors were used to build angle distributions for the PAIRS result in A, though PAIRS values were significant for a large range of numbers of nearest neighbors choice.

802

**(D)** Results of PAIRS test for different preprocessing steps. Error bars denote 95% confidence interval of the null distribution. Only 50 msec downsampling without smoothing indicated a lack of clustering in the data.

803

804

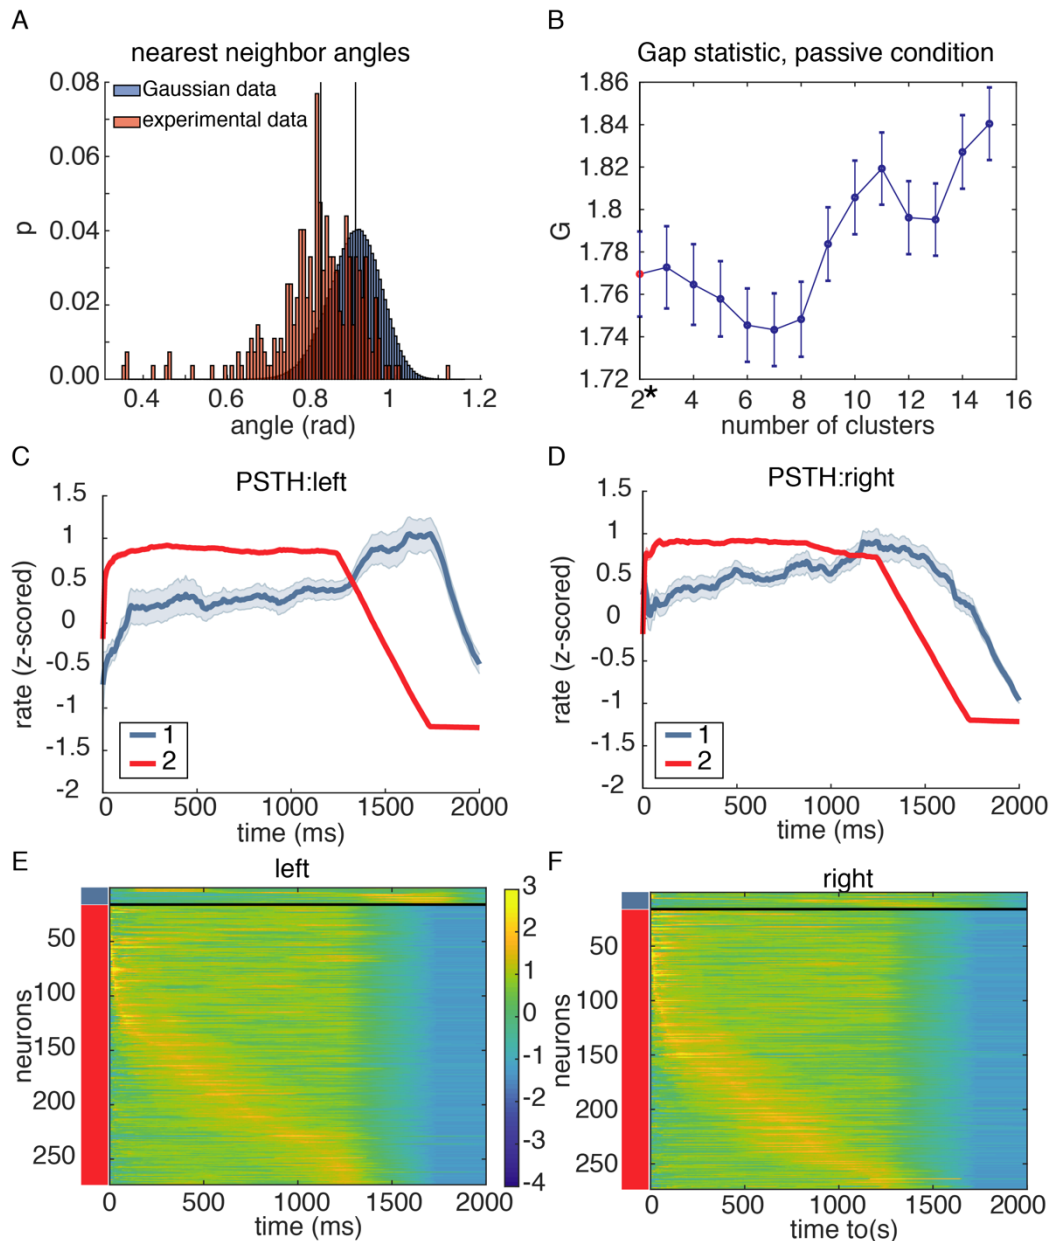

805

806

807

**Supplementary Figure 5. Clustering on conditional PSTHs in the passive listening condition.**

808 **(A)** Analysis of angles among nearest neighbors in feature space (red) compared to a null  
809 distribution of gaussian data (blue). KS-statistic between these distributions is significantly  
810 different (KS-test,  $p = 10^{-49}$ ), and PAIRS statistic additionally indicated clustering within the  
811 conditional PSTH (PAIRS = 0.09,  $p = 10^{-47}$ ).

812 **(B)** Gap statistic analysis indicates that two clusters are present in the feature space of conditional  
813 responses in the passive condition.

814 **(C-D)** Cluster averaged PSTHs for the 4-Hz stimulus (C) and 10-Hz stimulus (D).

815 **(E-F)** Population PSTHs, grouped by cluster and sorted by time-to-peak within each cluster.

816 Cluster 1 comprises only a small portion of the population. Error bars in all cases are SEM.

817 **References**

- 818 Andersen, R. A., & Cui, H. (2009). Intention, action planning, and decision making in parietal-  
819 frontal circuits. *Neuron*, 63(5), 568-583.
- 820 Averbeck, B. B., Latham, P. E., & Pouget, A. (2006). Neural correlations, population coding and  
821 computation. *Nat Rev Neurosci*, 7(5), 358-366.
- 822 Banno, T., Lestang, J. H., & Cohen, Y. E. (2020). Computational and neurophysiological  
823 principles underlying auditory perceptual decisions. *Curr Opin Physiol*, 18, 20-24.
- 824 Bizley, J. K., & Cohen, Y. E. (2013). The what, where and how of auditory-object perception.  
825 *Nat Rev Neurosci*, 14(10), 693-707.
- 826 Brody, C. D., & Hanks, T. D. (2016). Neural underpinnings of the evidence accumulator. *Curr*  
827 *Opin Neurobiol*, 37, 149-157.
- 828 Chung, S., & Abbott, L. F. (2021). Neural population geometry: An approach for understanding  
829 biological and artificial neural networks. *Curr Opin Neurobiol*, 70, 137-144.
- 830 Chung, S., Lee, D. D., & Sompolinsky, H. (2018). Classification and geometry of general  
831 perceptual manifolds. *Physical Review X*, 8(3), 031003.
- 832 Cohen, U., Chung, S., Lee, D. D., & Sompolinsky, H. (2020). Separability and geometry of  
833 object manifolds in deep neural networks. *Nat Commun*, 11(1), 746.
- 834 Cox, J., & Witten, I. B. (2019). Striatal circuits for reward learning and decision-making. *Nat Rev*  
835 *Neurosci*, 20(8), 482-494.
- 836 DiCarlo, J. J., & Cox, D. D. (2007). Untangling invariant object recognition. *Trends Cogn Sci*,  
837 11(8), 333-341.
- 838 DiCarlo, J. J., Zoccolan, D., & Rust, N. C. (2012). How does the brain solve visual object  
839 recognition. *Neuron*, 73(3), 415-434.
- 840 Driscoll, L. N., Pettit, N. L., Minderer, M., Chettih, S. N., & Harvey, C. D. (2017). Dynamic  
841 Reorganization of Neuronal Activity Patterns in Parietal Cortex. *Cell*, 170(5), 986-999.e16.
- 842 Felsen, G., & Mainen, Z. F. (2008). Neural substrates of sensory-guided locomotor decisions in  
843 the rat superior colliculus. *Neuron*, 60(1), 137-148.
- 844 Freedman, D. J., & Assad, J. A. (2016). Neuronal Mechanisms of Visual Categorization: An  
845 Abstract View on Decision Making. *Annu Rev Neurosci*, 39, 129-147.
- 846 Gold, J. I., & Shadlen, M. N. (2007). The neural basis of decision making. *Annu Rev Neurosci*,  
847 30, 535-574.
- 848 Gold, J. I., & Stocker, A. A. (2017). Visual Decision-Making in an Uncertain and Dynamic World.  
849 *Annu Rev Vis Sci*, 3, 227-250.
- 850 Granon, S., & Poucet, B. (2000). Involvement of the rat prefrontal cortex in cognitive functions:  
851 A central role for the prelimbic area. *Psychobiology*, 229-237.
- 852 Grunewald, A., Linden, J. F., & Andersen, R. A. (1999). Responses to auditory stimuli in  
853 macaque lateral intraparietal area. I. Effects of training. *J Neurophysiol*, 82(1), 330-342.
- 854 Hacker, M. J., & Ratcliff, R. (1979). A revised table for d' for M-alternative forced choice.  
855 *Perception & Psychophysics*, 26(2), 168-170.
- 856 Hackett, T. A., de la Mothe, L. A., Camalier, C. R., Falchier, A., Lakatos, P., Kajikawa, Y. et al.  
857 (2014). Feedforward and feedback projections of caudal belt and parabelt areas of auditory  
858 cortex: refining the hierarchical model. *Front Neurosci*, 8, 72.
- 859 Hanks, T. D., Ditterich, J., & Shadlen, M. N. (2006). Microstimulation of macaque area LIP  
860 affects decision-making in a motion discrimination task. *Nat Neurosci*, 9(5), 682-689.
- 861 Hanks, T. D., Kopec, C. D., Brunton, B. W., Duan, C. A., Erlich, J. C., & Brody, C. D. (2015).  
862 Distinct relationships of parietal and prefrontal cortices to evidence accumulation. *Nature*,  
863 520(7546), 220-223.
- 864 Harvey, C. D., Coen, P., & Tank, D. W. (2012). Choice-specific sequences in parietal cortex  
865 during a virtual-navigation decision task. *Nature*, 484(7392), 62-68.
- 866 Hocker, D. L., Brody, C. D., Savin, C., & Constantinople, C. M. (2021). Subpopulations of  
867 neurons in IOFC encode previous and current rewards at time of choice. *Elife*, 10.

- 868 Horwitz, G. D., Batista, A. P., & Newsome, W. T. (2004). Representation of an abstract  
869 perceptual decision in macaque superior colliculus. *J Neurophysiol*, *91*(5), 2281-2296.
- 870 Horwitz, G. D., & Newsome, W. T. (1999). Separate signals for target selection and movement  
871 specification in the superior colliculus. *Science*, *284*(5417), 1158-1161.
- 872 Horwitz, G. D., & Newsome, W. T. (2001). Target selection for saccadic eye movements:  
873 prelude activity in the superior colliculus during a direction-discrimination task. *J*  
874 *Neurophysiol*, *86*(5), 2543-2558.
- 875 Hubel, D. H., & Wiesel, T. N. (1962). Receptive fields, binocular interaction and functional  
876 architecture in the cat's visual cortex. *J Physiol*, *160*, 106-154.
- 877 Hubel, D. H., & Wiesel, T. N. (1968). Receptive fields and functional architecture of monkey  
878 striate cortex. *J Physiol*, *195*(1), 215-243.
- 879 Huk, A. C., & Shadlen, M. N. (2005). Neural activity in macaque parietal cortex reflects temporal  
880 integration of visual motion signals during perceptual decision making. *J Neurosci*, *25*(45),  
881 10420-10436.
- 882 Hwang, E. J., Dahlen, J. E., Mukundan, M., & Komiyama, T. (2017). History-based action  
883 selection bias in posterior parietal cortex. *Nat Commun*, *8*(1), 1242.
- 884 Iwamura, Y. (1998). Hierarchical somatosensory processing. *Curr Opin Neurobiol*, *8*(4), 522-  
885 528.
- 886 Joshi, S., & Gold, J. I. (2022). Context-dependent relationships between locus coeruleus firing  
887 patterns and coordinated neural activity in the anterior cingulate cortex. *Elife*, *11*.
- 888 Katz, L. N., Yates, J. L., Pillow, J. W., & Huk, A. C. (2016). Dissociated functional significance of  
889 decision-related activity in the primate dorsal stream. *Nature*, *535*(7611), 285-288.
- 890 Kiani, R., Hanks, T. D., & Shadlen, M. N. (2008). Bounded integration in parietal cortex  
891 underlies decisions even when viewing duration is dictated by the environment. *J Neurosci*,  
892 *28*(12), 3017-3029.
- 893 Licata, A. M., Kaufman, M. T., Raposo, D., Ryan, M. B., Sheppard, J. P., & Churchland, A. K.  
894 (2017). Posterior Parietal Cortex Guides Visual Decisions in Rats. *J Neurosci*, *37*(19), 4954-  
895 4966.
- 896 Linden, J. F., Grunewald, A., & Andersen, R. A. (1999). Responses to auditory stimuli in  
897 macaque lateral intraparietal area. II. Behavioral modulation. *J Neurophysiol*, *82*(1), 343-  
898 358.
- 899 Ludwig, K. A., Miriani, R. M., Langhals, N. B., Joseph, M. D., Anderson, D. J., & Kipke, D. R.  
900 (2009). Using a common average reference to improve cortical neuron recordings from  
901 microelectrode arrays. *J Neurophysiol*, *101*(3), 1679-1689.
- 902 Movshon, J. A., & Simoncelli, E. P. (2014). Representation of Naturalistic Image Structure in the  
903 Primate Visual Cortex. *Cold Spring Harb Symp Quant Biol*, *79*, 115-122.
- 904 Nakamura, K. (1999). Auditory spatial discriminatory and mnemonic neurons in rat posterior  
905 parietal cortex. *J Neurophysiol*, *82*(5), 2503-2517.
- 906 Namboodiri, V. M. K., Otis, J. M., van Heeswijk, K., Voets, E. S., Alghorazi, R. A., Rodriguez-  
907 Romaguera, J. et al. (2019). Single-cell activity tracking reveals that orbitofrontal neurons  
908 acquire and maintain a long-term memory to guide behavioral adaptation. *Nat Neurosci*,  
909 *22*(7), 1110-1121.
- 910 Okazawa, G., Hatch, C. E., Mancoo, A., Machens, C. K., & Kiani, R. (2021). Representational  
911 geometry of perceptual decisions in the monkey parietal cortex. *Cell*, *184*(14), 3748-  
912 3761.e18.
- 913 Pachitariu, Marius, Steinmetz, N. A. K., Shabnam N., Carandini, M., & Harris, K. D. (2016). *Fast*  
914 *and accurate spike sorting of high-channel count probes with KiloSort*. Proceedings from  
915 Advances in Neural Information Processing Systems 29.
- 916 Pandya, D. N., & Kuypers, H. G. (1969). Cortico-cortical connections in the rhesus monkey.  
917 *Brain Res*, *13*(1), 13-36.

- 918 Radtke-Schuller, S., Schuller, G., Angenstein, F., Grosser, O. S., Goldschmidt, J., & Budinger,  
919 E. (2016). Brain atlas of the Mongolian gerbil (*Meriones unguiculatus*) in CT/MRI-aided  
920 stereotaxic coordinates. *Brain Struct Funct*, 221 Suppl 1, 1-272.
- 921 Rauschecker, J. P., & Scott, S. K. (2009). Maps and streams in the auditory cortex: nonhuman  
922 primates illuminate human speech processing. *Nat Neurosci*, 12(6), 718-724.
- 923 Reep, R. L., Chandler, H. C., King, V., & Corwin, J. V. (1994). Rat posterior parietal cortex:  
924 topography of corticocortical and thalamic connections. *Exp Brain Res*, 100(1), 67-84.
- 925 Roitman, J. D., & Shadlen, M. N. (2002). Response of neurons in the lateral intraparietal area  
926 during a combined visual discrimination reaction time task. *J Neurosci*, 22(21), 9475-9489.
- 927 Rossant, C., Kadir, S. N., Goodman, D. F. M., Schulman, J., Hunter, M. L. D., Saleem, A. B. et  
928 al. (2016). Spike sorting for large, dense electrode arrays. *Nat Neurosci*, 19(4), 634-641.
- 929 Runyan, C. A., Piasini, E., Panzeri, S., & Harvey, C. D. (2017). Distinct timescales of population  
930 coding across cortex. *Nature*, 548(7665), 92-96.
- 931 Rust, N. C., & Dicarlo, J. J. (2010). Selectivity and tolerance ("invariance") both increase as  
932 visual information propagates from cortical area V4 to IT. *J Neurosci*, 30(39), 12978-12995.
- 933 Shadlen, M. N., & Kiani, R. (2013). Decision making as a window on cognition. *Neuron*, 80(3),  
934 791-806.
- 935 Shadlen, M. N., & Newsome, W. T. (2001). Neural basis of a perceptual decision in the parietal  
936 cortex (area LIP) of the rhesus monkey. *J Neurophysiol*, 86(4), 1916-1936.
- 937 Song, Y. H., Kim, J. H., Jeong, H. W., Choi, I., Jeong, D., Kim, K. et al. (2017). A Neural Circuit  
938 for Auditory Dominance over Visual Perception. *Neuron*, 93(5), 1236-1237.
- 939 Stephenson, C., Feather, J., Padhy, S., Elibol, O., Tang, H., McDermott, J. et al. (2019).  
940 *Untangling in Invariant Speech Recognition*. Proceedings from 33rd Conference on Neural  
941 Information Processing Systems.
- 942 Stricanne, B., Andersen, R. A., & Mazzoni, P. (1996). Eye-centered, head-centered, and  
943 intermediate coding of remembered sound locations in area LIP. *J Neurophysiol*, 76(3),  
944 2071-2076.
- 945 Town, S. M., Wood, K. C., & Bizley, J. K. (2018). Sound identity is represented robustly in  
946 auditory cortex during perceptual constancy. *Nat Commun*, 9(1), 4786.
- 947 Tsunada, J., Liu, A. S., Gold, J. I., & Cohen, Y. E. (2016). Causal contribution of primate  
948 auditory cortex to auditory perceptual decision-making. *Nat Neurosci*, 19(1), 135-142.
- 949 Wang, X. (2018). Cortical Coding of Auditory Features. *Annu Rev Neurosci*, 41, 527-552.
- 950 Wilber, A. A., Clark, B. J., Demecha, A. J., Mesina, L., Vos, J. M., & McNaughton, B. L. (2014).  
951 Cortical connectivity maps reveal anatomically distinct areas in the parietal cortex of the rat.  
952 *Front Neural Circuits*, 8, 146.
- 953 Yao, J. D., Gimoto, J., Constantinople, C. M., & Sanes, D. H. (2020). Parietal Cortex Is  
954 Required for the Integration of Acoustic Evidence. *Curr Biol*.
- 955 Yao, J. D., & Sanes, D. H. (2018). Developmental deprivation-induced perceptual and cortical  
956 processing deficits in awake-behaving animals. *Elife*, 7.
- 957 Zhou, Y., & Freedman, D. J. (2019). Posterior parietal cortex plays a causal role in perceptual  
958 and categorical decisions. *Science*, 365(6449), 180-185.
